# Supplementary material for: Constituents of Gastrodia elata and Their Neuroprotective Effects in HT22 Hippocampal Neuronal, R28 Retinal Cells, and BV2 Microglial Cells
Source: PubMed Central journal article supplement (PMC7465223; doi:10.3390/plants9081051), 2020-08-18
Supplement: plants-09-01051-s001.pdf [file plants-09-01051-s001.pdf]

1 Article

2 **Constituents of *Gastrodia elata* and Their Neuroprotective Effects in HT22 Hippocampal**  
3 **Neuronal, R28 Retinal Cells, and BV2 Microglial Cells**

4 **Hye Mi Kim <sup>1,†</sup>, Jaeyoung Kwon <sup>2,†</sup>, Kyerim Lee <sup>2,3</sup>, Jae Wook Lee <sup>2</sup>, Dae Sik Jang <sup>1,3,\*</sup> and Hak**  
5 **Cheol Kwon <sup>2,\*</sup>**

6 <sup>1</sup> College of Pharmacy, Kyung Hee University, Seoul 02447, Republic of Korea;  
7 hyemi586@gmail.com (H.M.K.); dsjang@khu.ac.kr (D.S.J.)

8 <sup>2</sup> KIST Gangneung Institute of Natural Products, Korea Institute of Science and Technology (KIST),  
9 Gangneung 25451, Republic of Korea; kgy1207@kist.re.kr (J.K.); klim8@kist.re.kr (K.L.);  
10 jwlee5@kist.re.kr (J.W.L.); hkwon@kist.re.kr (H.C.K.)

11 <sup>3</sup> KHU-KIST Department of Converging Science and Technology, Kyung Hee University, Seoul  
12 02447, Republic of Korea; klim8@kist.re.kr (K.L.); dsjang@khu.ac.kr (D.S.J.)

13 \* Correspondence: hkwon@kist.re.kr (H.C.K.); dsjang@khu.ac.kr (D.S.J.); /

14 † These authors contributed equally to this work and joint first authors

15

**16 List of Supporting Information**

17 **S1.**  $^1\text{H}$  and  $^{13}\text{C}$  NMR spectral data of compounds 4–19.

18 **Table S1.** Screening of all isolated compounds for protective effects against HT22 cell death caused  
19 by glutamate-induced toxicity.

20 **Table S2.** Screening of all isolated compounds (50  $\mu\text{M}$ ) for protective effects on R28 cell death caused  
21 by  $\text{H}_2\text{O}_2$  induced toxicity.

22 **Table S3.** Screening of all isolated compounds for inhibitory effects of nitric oxide production on  
23 LPS treated BV2 cell lines.

24 **Figure S1.** The  $^1\text{H}$  NMR spectrum of compound 1 (500 MHz,  $\text{CD}_3\text{COCD}_3$ ).

25 **Figure S2.** The  $^{13}\text{C}$  NMR spectrum of compound 1 (125 MHz,  $\text{CD}_3\text{COCD}_3$ ).

26 **Figure S3.** The  $^1\text{H}$ - $^1\text{H}$  COSY NMR spectrum of compound 1 (500MHz,  $\text{CD}_3\text{COCD}_3$ ).

27 **Figure S4.** The HSQC NMR spectrum of compound 1 (500 MHz,  $\text{CD}_3\text{COCD}_3$ ).

28 **Figure S5.** The HMBC NMR spectrum of compound 1 (500 MHz,  $\text{CD}_3\text{COCD}_3$ ).

29 **Figure S6.** The UV spectrum of compound 1 ( $\text{CH}_3\text{OH}$ ).

30 **Figure S7.** The IR spectrum of compound 1.

31 **Figure S8.** The HRESIMS spectrum of compound 1.

32 **Figure S9.** The  $^1\text{H}$  NMR spectrum of compound 2 (500 MHz,  $\text{CDCl}_3$ ).

33 **Figure S10.** The  $^{13}\text{C}$  NMR spectrum of compound 2 (125 MHz,  $\text{CDCl}_3$ ).

34 **Figure S11.** The  $^1\text{H}$ - $^1\text{H}$  COSY NMR spectrum of compound 2 (500 MHz,  $\text{CDCl}_3$ ).

35 **Figure S12.** The HSQC NMR spectrum of compound 2 (500 MHz,  $\text{CDCl}_3$ ).

36 **Figure S13.** The HMBC NMR spectrum of compound 2 (500 MHz,  $\text{CDCl}_3$ ).

37 **Figure S14.** The UV spectrum of compound 2 ( $\text{CH}_3\text{OH}$ ).

38 **Figure S15.** The IR spectrum of compound 2.

39 **Figure S16.** The HRESIMS spectrum of compound 2.

40 **Figure S17.** The  $^1\text{H}$  NMR spectrum of compound 3 (500 MHz,  $\text{CD}_3\text{OD}$ ).

41 **Figure S18.** The  $^{13}\text{C}$  NMR spectrum of compound 3 (125 MHz,  $\text{CD}_3\text{OD}$ ).

42 **Figure S19.** The  $^1\text{H}$ - $^1\text{H}$  COSY NMR spectrum of compound 3 (500 MHz,  $\text{CD}_3\text{OD}$ ).

43 **Figure S20.** The HSQC NMR spectrum of compound 3 (500 MHz,  $\text{CD}_3\text{OD}$ ).

44 **Figure S21.** The HMBC NMR spectrum of compound 3 (500 MHz,  $\text{CD}_3\text{OD}$ ).

45 **Figure S22.** The UV spectrum of compound 3 ( $\text{CH}_3\text{OH}$ ).

46 **Figure S23.** The IR spectrum of compound 3.

47 **Figure S24.** The HRESIMS spectrum of compound 3.

48

49 **S1.**  $^1\text{H}$  and  $^{13}\text{C}$  NMR spectral data of compounds 4–19.

50 4-[[4-(ethoxymethyl)phenoxy]methyl]phenol (**4**) exhibited following data: white amorphous  
51 powder;  $^1\text{H}$  NMR (500 MHz,  $\text{CD}_3\text{OD}$ )  $\delta$  : 7.26 (2H, d,  $J$  = 8.0 Hz, H-2, H-6), 7.26 (2H, d,  $J$  = 8.0 Hz, H-2',  
52 H-6'), 6.92 (2H, d,  $J$  = 8.0 Hz, H-3', H-5'), 6.76 (2H, d,  $J$  = 8.0 Hz, H-3, H-5), 4.93 (2H, s, H<sub>2</sub>-7), 4.44 (2H, s,  
53 H<sub>2</sub>-7'), 3.53 (2H, q,  $J$  = 7.0 Hz,  $\text{CH}_2\text{CH}_3$ ), 1.23 (3H, t,  $J$  = 7.0 Hz,  $\text{CH}_2\text{CH}_3$ );  $^{13}\text{C}$  NMR (125 MHz,  $\text{CD}_3\text{OD}$ )  
54  $\delta$  : 129.0 (C-1), 129.7 (C-2, 6), 115.6 (C-3, C-5), 155.9 (C-4), 70.0 (C-7), 130.8 (C-1'), 129.6 (C-2', C-6'),  
55 115.0 (C-3', C-5'), 158.6 (C-4'), 72.6 (C-7'), 65.7 ( $\text{CH}_2\text{CH}_3$ ), 15.3 ( $\text{CH}_2\text{CH}_3$ ).

56 Gastrol A (**5**) exhibited following data: white amorphous powder;  $^1\text{H}$  NMR (500 MHz,  
57  $\text{CD}_3\text{COCD}_3$ )  $\delta$  : 7.34 (2H, d,  $J$  = 8.5 Hz, H-2'', 6''), 7.31 (2H, d,  $J$  = 8.5 Hz, H-2, H-6), 7.23 (2H, d,  $J$  = 8.5  
58 Hz, H-2', H-6'), 7.01 (2H, d,  $J$  = 8.5 Hz, H-3, H-5), 6.89 (2H, d,  $J$  = 8.5 Hz, H-3'', H-5''), 6.85 (2H, d,  $J$  = 8.5  
59 Hz, H-3', H-5'), 5.03 (2H, s, H<sub>2</sub>-7''), 4.48 (2H, s, H<sub>2</sub>-7), 4.46 (2H, s, H<sub>2</sub>-7');  $^{13}\text{C}$  NMR (125 MHz,  
60  $\text{CD}_3\text{COCD}_3$ )  $\delta$  : 132.0 (C-1), 130.2 (C-2, C-6), 115.5 (C-3, C-5), 159.5 (C-4), 72.0 (C-7), 130.6 (C-1'), 130.4  
61 (C-2', C-6'), 115.9 (C-3', C-5'), 157.8 (C-4'), 72.3 (C-7'), 129.2 (C-1''), 130.4 (C-2'', C-6''), 116.1 (C-3'', 5''),  
62 158.2 (C-4''), 70.5 (C-7'').

63 Bis(4-hydroxyphenyl)methane (**6**) exhibited following data: white amorphous powder;  $^1\text{H}$   
64 NMR (500 MHz,  $\text{CD}_3\text{OD}$ )  $\delta$  : 6.96 (4H, d,  $J$  = 8.5 Hz, H-2, H-6, H-2', H-6'), 6.68 (4H, d,  $J$  = 8.5 Hz, H-3,  
65 H-5, H-3', H-5'), 3.74 (2H, s, H<sub>2</sub>-7);  $^{13}\text{C}$  NMR (125 MHz,  $\text{CD}_3\text{OD}$ )  $\delta$  : 134.4 (C-1, C-1'), 130.9 (C-2, C-6,  
66 C-2', C-6'), 116.2 (C-3, C-5, C-3', C-5'), 156.6 (C-4, C-4'), 41.3 (C-7).

67 4-Hydroxybenzyl vanillyl ether (**7**) exhibited following data: white amorphous powder;  $^1\text{H}$   
68 NMR (500 MHz,  $\text{CD}_3\text{OD}$ )  $\delta$  : 7.17 (2H, d,  $J$  = 8.5 Hz, H-2, H-6), 6.91 (1H, d,  $J$  = 1.5 Hz, H-2'), 6.77 (1H,  
69 dd,  $J$  = 8.0, 1.5 Hz, H-6'), 6.77 (1H, d,  $J$  = 8.0 Hz, H-5'), 6.76 (2H, d,  $J$  = 8.5 Hz, H-3, H-5), 4.41 (2H, s,  
70 H<sub>2</sub>-7'), 4.41 (2H, s, H<sub>2</sub>-7), 3.84 (3H, s, 3'-OCH<sub>3</sub>);  $^{13}\text{C}$  NMR (125 MHz,  $\text{CD}_3\text{OD}$ )  $\delta$  : 131.2 (C-1), 131.1 (C-2,  
71 6), 116.3 (C-3, 5), 158.5 (C-4), 72.9 (C-7), 130.5 (C-1'), 113.2 (C-2'), 149.2 (C-3'), 147.6 (C-4'), 116.1 (C-5'),  
72 122.5 (C-6'), 73.1 (C-7'), 56.6 (3'-OCH<sub>3</sub>).

73 Bis(4-hydroxybenzyl)ether (**8**) exhibited following data: colorless oil;  $^1\text{H}$  NMR (500 MHz,  
74  $\text{CD}_3\text{OD}$ )  $\delta$  : 7.16 (4H, d,  $J$  = 8.5 Hz, H-2, H-6, H-2', H-6'), 6.76 (4H, d,  $J$  = 8.5 Hz, H-3, H-5, H-3', H-5'),  
75 4.40 (4H, s, H<sub>2</sub>-7, H<sub>2</sub>-7');  $^{13}\text{C}$  NMR (125 MHz,  $\text{CD}_3\text{OD}$ )  $\delta$  : 130.5 (C-1, C-1'), 131.1 (C-2, C-6, C-2', C-6'),  
76 116.3 (C-3, C-5, C-3', C-5'), 158.7 (C-4, C-4'), 72.9 (C-7, C-7').

77 2,4-Bis(4-hydroxybenzyl)phenol (**9**) exhibited following data: brownish amorphous powder;  
78  $^1\text{H}$  NMR (500 MHz,  $\text{CD}_3\text{OD}$ )  $\delta$  : 6.99 (2H, d,  $J$  = 8.5 Hz, H-2', H-6'), 6.92 (2H, d,  $J$  = 8.5 Hz, H-2'', H-6''),  
79 6.80 (1H, d,  $J$  = 2.0 Hz, H-2), 6.78 (1H, dd,  $J$  = 8.0, 2.0 Hz, H-5), 6.66 (1H, d,  $J$  = 8.0 Hz, H-6), 6.66 (2H,  
80 d,  $J$  = 8.5 Hz, H-3', H-5'), 6.66 (2H, d,  $J$  = 8.5 Hz, H-3'', H-5''), 3.78 (2H, s, H<sub>2</sub>-7'), 3.69 (2H, s, H<sub>2</sub>-7'');  $^{13}\text{C}$   
81 NMR (125 MHz,  $\text{CD}_3\text{OD}$ )  $\delta$  : 154.4 (C-1), 133.9 (C-2), 132.1 (C-3), 134.6 (C-4), 128.4 (C-5), 116.1 (C-6),  
82 129.7 (C-1'), 131.0 (C-2', C-6'), 116.2 (C-3', C-5'), 156.4 (C-4'), 35.9 (C-7'), 134.3 (C-1''), 130.8 (C-2'',  
83 C-6''), 116.1 (C-3'', C-5''), 156.5 (C-4''), 41.4 (C-7'').

84 Gastrodigenin (**10**) exhibited following data: white amorphous powder;  $^1\text{H}$  NMR (500 MHz,  
85  $\text{CD}_3\text{OD}$ )  $\delta$  : 7.16 (2H, d,  $J$  = 8.5 Hz, H-2, H-6), 6.76 (2H, d,  $J$  = 8.5 Hz, H-3, H-5), 4.39 (2H, s, H<sub>2</sub>-7);  $^{13}\text{C}$   
86 NMR (125 MHz,  $\text{CD}_3\text{OD}$ )  $\delta$  : 130.4 (C-1), 131.1 (C-2, C-6), 116.3 (C-3, C-5), 158.5 (C-4), 72.8 (C-7).

87 4-Hydroxybenzyl ethyl ether (**11**) exhibited following data: white amorphous powder;  $^1\text{H}$  NMR  
88 (500 MHz,  $\text{CDCl}_3$ )  $\delta$  : 7.10 (2H, d,  $J$  = 8.0 Hz, H-2, H-6), 6.72 (2H, d,  $J$  = 8.0 Hz, H-3, H-5), 4.42 (2H, s,  
89 H<sub>2</sub>-7), 3.53 (2H, q,  $J$  = 7.0 Hz,  $\text{CH}_2\text{CH}_3$ ), 1.22 (3H, t,  $J$  = 7.0 Hz,  $\text{CH}_2\text{CH}_3$ );  $^{13}\text{C}$  NMR (125 MHz,  $\text{CDCl}_3$ )  $\delta$  :  
90 130.2 (C-1), 129.9 (C-2, C-6), 115.5 (C-3, C-5), 155.7 (C-4), 72.7 (C-7), 65.7 ( $\text{CH}_2\text{CH}_3$ ), 15.3 ( $\text{CH}_2\text{CH}_3$ ).

91 Gastrodin (**12**) exhibited following data: white amorphous powder;  $^1\text{H}$  NMR (500 MHz,  $\text{CD}_3\text{OD}$ )  
92  $\delta$  : 7.28 (2H, d,  $J$  = 8.5 Hz, H-2, H-6), 7.08 (2H, d,  $J$  = 8.5 Hz, H-3, H-5), 4.89 (1H, d,  $J$  = 7.5 Hz, Glc H-1),  
93 4.54 (2H, s, H<sub>2</sub>-7), 3.89 (1H, dd,  $J$  = 12.0, 2.0 Hz, Glc H<sub>2</sub>-6a), 3.70 (1H, dd,  $J$  = 12.0, 5.0 Hz, Glc H<sub>2</sub>-6b),  
94 3.46-3.37 (4H, Glc H-2, H-3, H-4, H-5);  $^{13}\text{C}$  NMR (125 MHz,  $\text{CD}_3\text{OD}$ )  $\delta$  : 136.8 (C-1), 129.6 (C-2, C-6),  
95 117.8 (C-3, C-5), 158.7 (C-4), 65.0 (C-7), 102.6 (Glc C-1), 75.1 (Glc C-2), 78.3 (Glc C-3), 71.6 (Glc C-4),  
96 78.2 (Glc C-5), 62.7 (Glc C-6).

97 4-Hydroxybenzaldehyde (**13**) exhibited following data: brownish amorphous powder;  $^1\text{H}$  NMR  
98 (500 MHz,  $\text{CD}_3\text{OD}$ )  $\delta$  : 9.76 (1H, s,  $\text{CHO}$ ) 6.96 (2H, d,  $J$  = 8.5 Hz, H-2, H-6), 6.68 (2H, d,  $J$  = 8.5 Hz, H-3,  
99 H-5);  $^{13}\text{C}$  NMR (125 MHz,  $\text{CD}_3\text{OD}$ )  $\delta$  : 130.4 (C-1), 133.6 (C-2, C-6), 117.1 (C-3, C-5), 165.5 (C-4), 193.0  
100 ( $\text{CHO}$ ).

101 3,5-Dimethoxybenzoic acid-4-*O*- $\beta$ -D-glucopyranoside (**14**) exhibited following data: white  
102 amorphous powder;  $^1\text{H}$  NMR (500 MHz,  $\text{DMSO}-d_6$ )  $\delta$  : 7.22 (2H, s, H-2, H-6), 5.11 (1H, d,  $J$  = 7.0 Hz,

103 Glc H-1), 3.59-3.06 (6H, Glc H-2, H-3, H-4, H-5, H<sub>2</sub>-6), 3.80 (6H, s, 3-OCH<sub>3</sub>, 5-OCH<sub>3</sub>); <sup>13</sup>C NMR (125  
104 MHz, DMSO-*d*<sub>6</sub>) δ : 136.0 (C-1), 116.9 (C-2, C-6), 161.9 (C-3, C-5), 147.6 (C-4), 176.8 (COOH), 111.6  
105 (Glc C-1), 83.9 (Glc C-2), 87.1 (Glc C-3), 79.6 (Glc C-4), 86.3 (Glc C-5), 70.5 (Glc C-6), 66.0 (3-OCH<sub>3</sub>,  
106 5-OCH<sub>3</sub>).

107 Parishin E (**15**) exhibited following data: yellowish oil; <sup>1</sup>H NMR (500 MHz, CD<sub>3</sub>OD) δ : 7.31 (2H,  
108 d, *J* = 8.5 Hz, H-2', H-6'), 7.08 (2H, d, *J* = 8.5 Hz, H-3', H-5'), 5.06 (2H, d, *J* = 2.5 Hz, H<sub>2</sub>-7'), 4.91 (1H, d, *J*  
109 = 7.5 Hz, Glc H-1), 3.89 (1H, dd, *J* = 12.0, 2.0 Hz, Glc H<sub>2</sub>-6a), 3.70 (1H, dd, *J* = 12.0, 5.5 Hz, Glc H<sub>2</sub>-6b),  
110 3.47-3.30 (4H, Glc, H-2, H-3, H-4, H-5), 2.96 (1H, d, *J* = 15.5 Hz, H<sub>2</sub>-3a), 2.92 (1H, d, *J* = 16.0 Hz, H<sub>2</sub>-1a),  
111 2.85 (1H, d, *J* = 15.5 Hz, H<sub>2</sub>-3b), 2.79 (1H, d, *J* = 16.0 Hz, H<sub>2</sub>-1b); <sup>13</sup>C NMR (125 MHz, CD<sub>3</sub>OD) δ : 44.2  
112 (C-1), 75.1 (C-2), 44.5 (C-3), 131.4 (C-1'), 131.0 (C-2', C-6'), 117.9 (C-3', C-5'), 159.2 (C-4'), 67.4 (C-7'),  
113 102.4 (Glc C-1), 75.1 (Glc C-2), 78.3 (Glc C-3), 71.6 (Glc C-4), 78.2 (Glc C-5), 62.7 (Glc C-6), 171.5  
114 (COOR), 173.9 (COOH), 177.1 (COOH).

115 Adenosine (**16**) exhibited following data: white amorphous powder; <sup>1</sup>H NMR (500 MHz,  
116 DMSO-*d*<sub>6</sub>) δ : 8.35 (1H, s, H-8), 8.14 (1H, s, H-2), 7.37 (2H, br s, NH<sub>2</sub>), 5.88 (1H, d, *J* = 6.0 Hz, H-1'), 5.46  
117 (1H, br d, *J* = 6.0 Hz, 2'-OH), 5.45 (1H, br dd, *J* = 7.5, 4.5 Hz, 5'-OH), 5.20 (1H, br d, *J* = 4.5 Hz, 3'-OH),  
118 4.61 (1H, ddd, *J* = 6.0, 6.0, 5.0 Hz, H-2'), 4.14 (1H, ddd, *J* = 5.0, 4.5, 3.0 Hz, H-3'), 3.96 (1H, ddd, *J* = 3.5,  
119 3.5, 3.0 Hz, H-4'), 3.67 (1H, ddd, *J* = 12.0, 4.5, 3.5 Hz, H<sub>2</sub>-5'a), 3.55 (1H, ddd, *J* = 12.0, 7.5, 3.5 Hz, H<sub>2</sub>-5'b);  
120 <sup>13</sup>C NMR (125 MHz, DMSO-*d*<sub>6</sub>) δ : 152.3 (C-2), 149.0 (C-4), 119.3 (C-5), 156.1 (C-6), 139.9 (C-8), 87.9  
121 (C-1'), 73.4 (C-2'), 70.6 (C-3'), 85.8 (C-4'), 61.6 (C-5').

122 S-(4-Hydroxybenzyl) glutathione (**17**) exhibited following data: white amorphous powder; <sup>1</sup>H  
123 NMR (500 MHz, DMSO-*d*<sub>6</sub>) δ : 7.09 (2H, d, *J* = 8.5 Hz, H-2''', H-6'''), 6.69 (2H, d, *J* = 8.5 Hz, H-3''', H-5'''),  
124 4.50 (1H, dd, *J* = 9.0, 5.0 Hz, H-2'), 3.71 (1H, d, *J* = 2.5 Hz, H<sub>2</sub>-2''a), 3.63 (1H, d, *J* = 2.5 Hz, H<sub>2</sub>-2''b), 3.63  
125 (2H, s, H<sub>2</sub>-7'''), 3.40 (1H, t, *J* = 6.5 Hz, H-2), 2.78 (1H, dd, *J* = 14.0, 5.0 Hz, H<sub>2</sub>-3'a), 2.55 (1H, dd, *J* = 14.0,  
126 9.0 Hz, H<sub>2</sub>-3'b), 2.32 (2H, m, H<sub>2</sub>-4), 1.93 (1H, br dt, *J* = 6.5, 6.5 Hz, H-3); <sup>13</sup>C NMR (125 MHz, DMSO-*d*<sub>6</sub>)  
127 δ : 171.7 (C-1), 53.1 (C-2), 26.8 (C-3), 31.5 (C-4), 170.9 (C-5), 170.7 (C-1'), 52.2 (C-2'), 33.0 (C-3'), 170.6  
128 (C-1''), 41.2 (C-2''), 128.1 (C-1'''), 129.9 (C-2''', C-6'''), 115.1 (C-3''', C-5'''), 156.3 (C-4'''), 34.8 (C-7''').

129 Palmitic acid ethyl ester (**18**) exhibited following data: yellowish waxy-like; <sup>1</sup>H NMR (500 MHz,  
130 CDCl<sub>3</sub>) δ : 4.10 (2H, q, *J* = 7.0 Hz, CH<sub>2</sub>CH<sub>3</sub>), 2.26 (2H, t, *J* = 7.5 Hz, H<sub>2</sub>-2), 1.60 (2H, m, H<sub>2</sub>-3), 1.28-1.22  
131 (24H, br m, H<sub>2</sub>-4, H<sub>2</sub>-5, H<sub>2</sub>-6, H<sub>2</sub>-7, H<sub>2</sub>-8, H<sub>2</sub>-9, H<sub>2</sub>-10, H<sub>2</sub>-11, H<sub>2</sub>-12, H<sub>2</sub>-13, H<sub>2</sub>-14, H<sub>2</sub>-15) 1.23 (3H, t, *J* =  
132 7.0 Hz, CH<sub>2</sub>CH<sub>3</sub>), 0.86 (3H, t, *J* = 7.0 Hz, H<sub>3</sub>-16); <sup>13</sup>C NMR (125 MHz, CDCl<sub>3</sub>) δ : 174.2 (C-1), 34.6 (C-2),  
133 25.2 (C-3), 29.4 (C-4), 29.6 (C-5), 30.0, 30.0, 29.9, 29.9, 29.9, 29.8, 29.7 (C-6, C-7, C-8, C-9, C-10, C-11,  
134 C-12), 29.5 (C-13), 32.2 (C-14), 22.9 (C-15), 14.3 (C-16), 60.4 (CH<sub>2</sub>CH<sub>3</sub>), 14.5 (CH<sub>2</sub>CH<sub>3</sub>).

135 Linoleic acid ethyl ester (**19**) exhibited following data: colorless oil; <sup>1</sup>H NMR (500 MHz, CDCl<sub>3</sub>)  
136 δ : 5.33 (4H, m, H-9, H-10, H-12, H-13), 4.13 (2H, q, *J* = 7.0 Hz, CH<sub>2</sub>CH<sub>3</sub>), 2.75 (2H, t, *J* = 6.5 Hz, H<sub>2</sub>-11),  
137 2.26 (2H, t, *J* = 7.5 Hz, H<sub>2</sub>-2), 2.02 (4H, br dt, *J* = 7.0, 7.0 Hz, H<sub>2</sub>-8, H<sub>2</sub>-14), 1.60 (2H, br m, H-3),  
138 1.36-1.29 (14H, br m, H<sub>2</sub>-4, H<sub>2</sub>-5, H<sub>2</sub>-6, H<sub>2</sub>-7, H<sub>2</sub>-15, H<sub>2</sub>-16, H<sub>2</sub>-17), 1.23 (3H, t, *J* = 7.0 Hz, CH<sub>2</sub>CH<sub>3</sub>),  
139 0.87 (3H, t, *J* = 7.0 Hz, H<sub>3</sub>-18); <sup>13</sup>C NMR (125 MHz, CDCl<sub>3</sub>) δ : 174.1 (C-1), 34.6 (C-2), 31.7 (C-3), 29.8,  
140 29.6, 29.4, 29.3, 29.3, 25.2, 22.8 (C-4, C-5, C-6, C-7, C-15, C-16, C-17), 27.4 (C-8), 128.1 (C-9), 130.4  
141 (C-10), 25.8 (C-11), 130.3 (C-12), 128.2 (C-13), 27.4 (C-14), 14.3 (C-18), 60.4 (CH<sub>2</sub>CH<sub>3</sub>), 14.5 (CH<sub>2</sub>CH<sub>3</sub>).

142

143 **Table S1.** Screening of all isolated compounds for protective effects against HT22 cell death caused  
 144 by glutamate-induced toxicity.

| Compound  | Concentration<br>( $\mu$ M) | Cell viability<br>(%) | Compound    | Concentration<br>( $\mu$ M) | Cell viability<br>(%) |
|-----------|-----------------------------|-----------------------|-------------|-----------------------------|-----------------------|
| <b>1</b>  | 5.6                         | 38.27 $\pm$ 5.96      | <b>2</b>    | 5.6                         | 22.14 $\pm$ 2.82      |
|           | 16.6                        | 33.62 $\pm$ 3.90      |             | 16.6                        | 22.88 $\pm$ 3.46      |
|           | 50.0                        | 71.48 $\pm$ 6.68      |             | 50.0                        | 72.26 $\pm$ 7.41      |
| <b>3</b>  | 5.6                         | 37.94 $\pm$ 3.77      | <b>4</b>    | 5.6                         | 120.02 $\pm$ 2.41     |
|           | 16.6                        | 51.75 $\pm$ 3.28      |             | 16.6                        | 95.83 $\pm$ 14.01     |
|           | 50.0                        | 25.20 $\pm$ 2.20      |             | 50.0                        | 53.17 $\pm$ 0.12      |
| <b>5</b>  | 5.6                         | 110.34 $\pm$ 2.78     | <b>6</b>    | 5.6                         | 22.51 $\pm$ 1.90      |
|           | 16.6                        | 110.34 $\pm$ 2.71     |             | 16.6                        | 25.71 $\pm$ 2.71      |
|           | 50.0                        | 98.02 $\pm$ 0.78      |             | 50.0                        | 26.28 $\pm$ 9.32      |
| <b>7</b>  | 5.6                         | 24.33 $\pm$ 4.86      | <b>8</b>    | 5.6                         | 32.68 $\pm$ 1.32      |
|           | 16.6                        | 32.69 $\pm$ 2.03      |             | 16.6                        | 32.47 $\pm$ 3.60      |
|           | 50.0                        | 85.61 $\pm$ 10.78     |             | 50.0                        | 100.35 $\pm$ 1.49     |
| <b>9</b>  | 5.6                         | 31.79 $\pm$ 9.05      | <b>10</b>   | 5.6                         | 22.72 $\pm$ 1.82      |
|           | 16.6                        | 20.67 $\pm$ 4.07      |             | 16.6                        | 19.13 $\pm$ 3.92      |
|           | 50.0                        | 17.37 $\pm$ 2.18      |             | 50.0                        | 23.79 $\pm$ 0.19      |
| <b>11</b> | 5.6                         | 30.78 $\pm$ 4.96      | <b>12</b>   | 5.6                         | 32.42 $\pm$ 1.45      |
|           | 16.6                        | 27.67 $\pm$ 9.04      |             | 16.6                        | 28.60 $\pm$ 2.89      |
|           | 50.0                        | 24.90 $\pm$ 3.26      |             | 50.0                        | 23.07 $\pm$ 1.12      |
| <b>13</b> | 5.6                         | 21.75 $\pm$ 8.62      | <b>14</b>   | 5.6                         | 22.86 $\pm$ 10.6      |
|           | 16.6                        | 20.21 $\pm$ 0.72      |             | 16.6                        | 24.10 $\pm$ 3.53      |
|           | 50.0                        | 20.07 $\pm$ 0.43      |             | 50.0                        | 20.16 $\pm$ 1.47      |
| <b>15</b> | 5.6                         | 34.32 $\pm$ 3.65      | <b>16</b>   | 5.6                         | 37.70 $\pm$ 0.96      |
|           | 16.6                        | 33.15 $\pm$ 3.21      |             | 16.6                        | 59.00 $\pm$ 6.08      |
|           | 50.0                        | 23.59 $\pm$ 0.90      |             | 50.0                        | 76.25 $\pm$ 5.31      |
| <b>17</b> | 5.6                         | 33.95 $\pm$ 6.46      | <b>18</b>   | 5.6                         | 45.92 $\pm$ 3.18      |
|           | 16.6                        | 54.24 $\pm$ 18.69     |             | 16.6                        | 57.65 $\pm$ 4.64      |
|           | 50.0                        | 27.75 $\pm$ 1.21      |             | 50.0                        | 50.30 $\pm$ 6.46      |
| <b>19</b> | 5.6                         | 30.32 $\pm$ 6.53      | <b>DMSO</b> | -                           | 100.00 $\pm$ 2.00     |
|           | 16.6                        | 31.50 $\pm$ 6.60      | <b>Glu</b>  | 5 mM                        | 44.62 $\pm$ 2.00      |
|           | 50.0                        | 19.65 $\pm$ 1.92      | <b>NAC</b>  | 1 mM                        | 102.40 $\pm$ 0.95     |

145

146 **Table S2.** Screening of all isolated compounds (50  $\mu$ M) for protective effects on R28 cell death  
 147 caused by H<sub>2</sub>O<sub>2</sub> induced toxicity.  
 148

| No                | Cell viability (%) | No          | Cell viability (%) | No                | Cell viability (%) |
|-------------------|--------------------|-------------|--------------------|-------------------|--------------------|
| 1                 | 7.99 $\pm$ 0.13    | 2           | 79.88 $\pm$ 0.59   | 3                 | 53.47 $\pm$ 3.14   |
| 4                 | 31.60 $\pm$ 3.47   | 5           | 55.27 $\pm$ 0.18   | 6                 | 76.13 $\pm$ 0.04   |
| 7                 | 82.66 $\pm$ 2.49   | 8           | 40.88 $\pm$ 4.19   | 9                 | 19.75 $\pm$ 9.86   |
| 10                | 53.07 $\pm$ 2.87   | 11          | 49.41 $\pm$ 9.92   | 12                | 52.01 $\pm$ 2.52   |
| 13                | 54.10 $\pm$ 1.33   | 14          | 53.99 $\pm$ 6.32   | 15                | 55.90 $\pm$ 2.22   |
| 16                | 58.30 $\pm$ 3.37   | 17          | 57.64 $\pm$ 4.14   | 18                | 54.49 $\pm$ 5.13   |
| 19                | 12.91 $\pm$ 4.62   | <b>DMSO</b> | 100.00 $\pm$ 3.22  | <b>Glu (5 mM)</b> | 50.77 $\pm$ 0.02   |
| <b>NAC (1 mM)</b> | 96.70 $\pm$ 0.95   |             |                    |                   |                    |

149

150

151

152 **Table S3.** Screening of all isolated compounds for inhibitory effects of nitric oxide production on  
 153 LPS treated BV2 cell lines.  
 154

| Compound  | Concentration<br>( $\mu\text{M}$ ) | Litrite<br>( $\mu\text{M}$ ) | Compound    | Concentration<br>( $\mu\text{M}$ ) | Litrite <sup>a</sup><br>( $\mu\text{M}$ ) |
|-----------|------------------------------------|------------------------------|-------------|------------------------------------|-------------------------------------------|
| <b>1</b>  | 0.2                                | 27.91 $\pm$ 3.09             | <b>2</b>    | 0.2                                | 30.80 $\pm$ 0.33                          |
|           | 1.8                                | 27.52 $\pm$ 1.66             |             | 1.8                                | 25.88 $\pm$ 0.22                          |
|           | 16.6                               | 29.47 $\pm$ 2.21             |             | 16.6                               | 27.91 $\pm$ 0.44                          |
|           | 50.0                               | 25.17 $\pm$ 3.65             |             | 50.0                               | 28.77 $\pm$ 0.11                          |
| <b>3</b>  | 0.2                                | 28.84 $\pm$ 0.66             | <b>4</b>    | 0.2                                | 28.30 $\pm$ 1.21                          |
|           | 1.8                                | 27.13 $\pm$ 0.66             |             | 1.8                                | 27.91 $\pm$ 0.88                          |
|           | 16.6                               | 26.73 $\pm$ 0.99             |             | 16.6                               | 23.53 $\pm$ 0.00                          |
|           | 50.0                               | 25.48 $\pm$ 0.77             |             | 50.0                               | 20.09 $\pm$ 1.10                          |
| <b>5</b>  | 0.2                                | 26.34 $\pm$ 1.55             | <b>6</b>    | 0.2                                | 29.86 $\pm$ 0.99                          |
|           | 1.8                                | 25.88 $\pm$ 2.65             |             | 1.8                                | 23.77 $\pm$ 0.11                          |
|           | 16.6                               | 25.56 $\pm$ 0.66             |             | 16.6                               | 25.95 $\pm$ 0.11                          |
|           | 50.0                               | 23.38 $\pm$ 1.10             |             | 50.0                               | 30.02 $\pm$ 0.11                          |
| <b>7</b>  | 0.2                                | 28.92 $\pm$ 0.77             | <b>8</b>    | 0.2                                | 28.76 $\pm$ 1.21                          |
|           | 1.8                                | 25.41 $\pm$ 1.33             |             | 1.8                                | 27.36 $\pm$ 0.11                          |
|           | 16.6                               | 26.97 $\pm$ 0.44             |             | 16.6                               | 27.67 $\pm$ 0.33                          |
|           | 50.0                               | 26.03 $\pm$ 1.10             |             | 50.0                               | 28.06 $\pm$ 1.99                          |
| <b>9</b>  | 0.2                                | 27.52 $\pm$ 0.33             | <b>10</b>   | 0.2                                | 27.91 $\pm$ 1.32                          |
|           | 1.8                                | 29.08 $\pm$ 0.33             |             | 1.8                                | 25.95 $\pm$ 1.43                          |
|           | 16.6                               | 27.98 $\pm$ 2.10             |             | 16.6                               | 26.97 $\pm$ 0.22                          |
|           | 50.0                               | 9.94 $\pm$ 2.78              |             | 50.0                               | 27.36 $\pm$ 3.87                          |
| <b>11</b> | 0.2                                | 29.16 $\pm$ 1.33             | <b>12</b>   | 0.2                                | 27.83 $\pm$ 0.77                          |
|           | 1.8                                | 22.98 $\pm$ 0.11             |             | 1.8                                | 27.20 $\pm$ 1.44                          |
|           | 16.6                               | 23.92 $\pm$ 0.99             |             | 16.6                               | 26.66 $\pm$ 0.88                          |
|           | 50.0                               | 26.11 $\pm$ 1.44             |             | 50.0                               | 25.95 $\pm$ 0.99                          |
| <b>13</b> | 0.2                                | 30.64 $\pm$ 0.55             | <b>14</b>   | 0.2                                | 27.44 $\pm$ 0.44                          |
|           | 1.8                                | 22.59 $\pm$ 0.22             |             | 1.8                                | 24.55 $\pm$ 1.88                          |
|           | 16.6                               | 22.83 $\pm$ 0.11             |             | 16.6                               | 23.84 $\pm$ 1.10                          |
|           | 50.0                               | 26.81 $\pm$ 0.00             |             | 50.0                               | 23.22 $\pm$ 0.22                          |
| <b>15</b> | 0.2                                | 27.98 $\pm$ 0.77             | <b>16</b>   | 0.2                                | 29.47 $\pm$ 2.21                          |
|           | 1.8                                | 27.83 $\pm$ 0.55             |             | 1.8                                | 26.73 $\pm$ 0.77                          |
|           | 16.6                               | 24.39 $\pm$ 1.21             |             | 16.6                               | 25.95 $\pm$ 2.10                          |
|           | 50.0                               | 26.81 $\pm$ 0.88             |             | 50.0                               | 24.47 $\pm$ 1.77                          |
| <b>17</b> | 0.2                                | 32.20 $\pm$ 0.11             | <b>18</b>   | 0.2                                | 32.13 $\pm$ 2.65                          |
|           | 1.8                                | 29.10 $\pm$ 2.65             |             | 1.8                                | 27.91 $\pm$ 1.10                          |
|           | 16.6                               | 26.11 $\pm$ 2.32             |             | 16.6                               | 26.19 $\pm$ 0.66                          |
|           | 50.0                               | 25.56 $\pm$ 1.77             |             | 50.0                               | 26.03 $\pm$ 0.88                          |
| <b>19</b> | 0.2                                | 34.16 $\pm$ 1.44             | <b>DMSO</b> | -                                  | 2.91 $\pm$ 0.22                           |
|           | 1.8                                | 29.08 $\pm$ 2.54             | <b>LPS</b>  | 1 $\mu\text{g/ml}$                 | 32.43 $\pm$ 0.44                          |
|           | 16.6                               | 26.97 $\pm$ 2.65             |             |                                    |                                           |
|           | 50.0                               | 25.95 $\pm$ 1.44             |             |                                    |                                           |

155 <sup>1</sup> Secreted nitric oxide levels were determined by Griess reagent. <sup>2</sup> 1  $\mu\text{g/mL}$  of LPS was used in NO production  
 156 and cell viability assay. The % values are representative relative cell viabilities compared with DMSO treated  
 157 cell growth (negative control, 100% value)

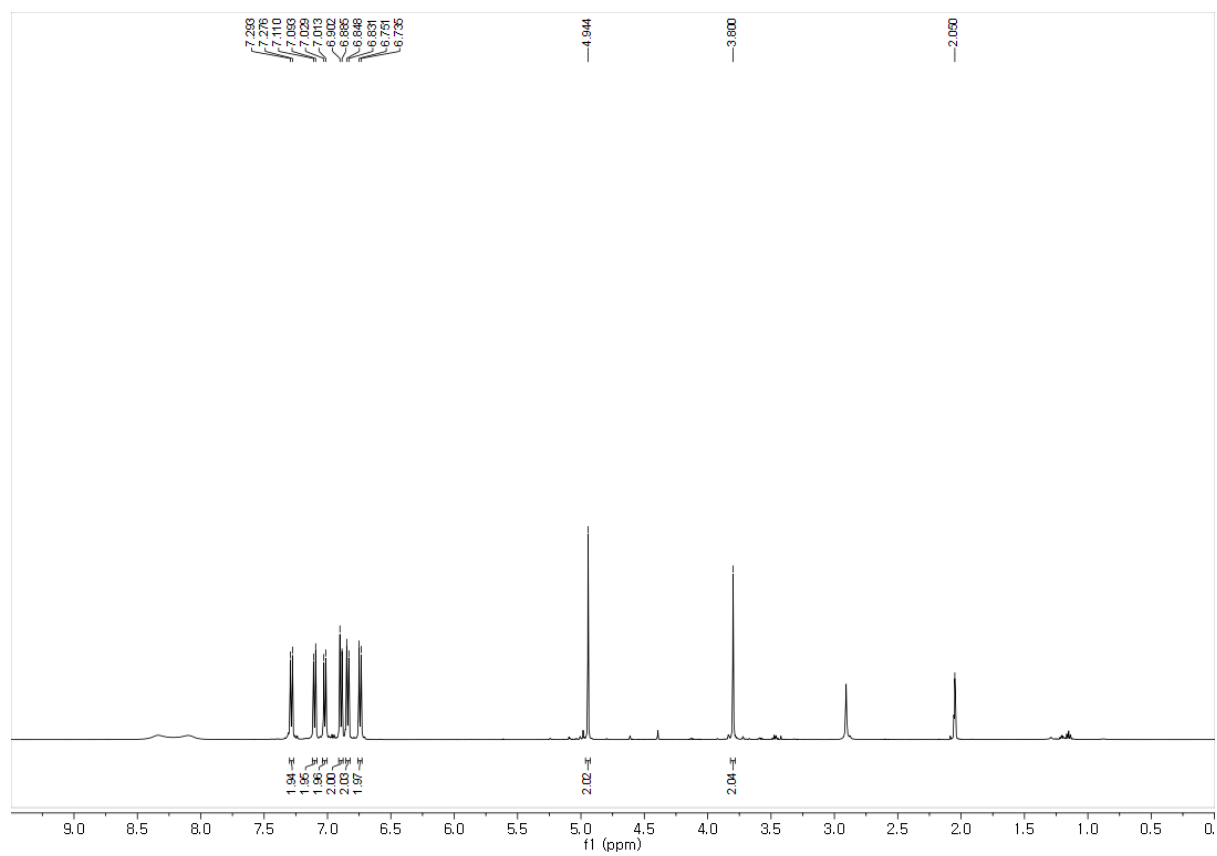

158

159

160

**Figure S1.** The  $^1\text{H}$  NMR spectrum of compound **1** (500 MHz,  $\text{CD}_3\text{COCD}_3$ ).



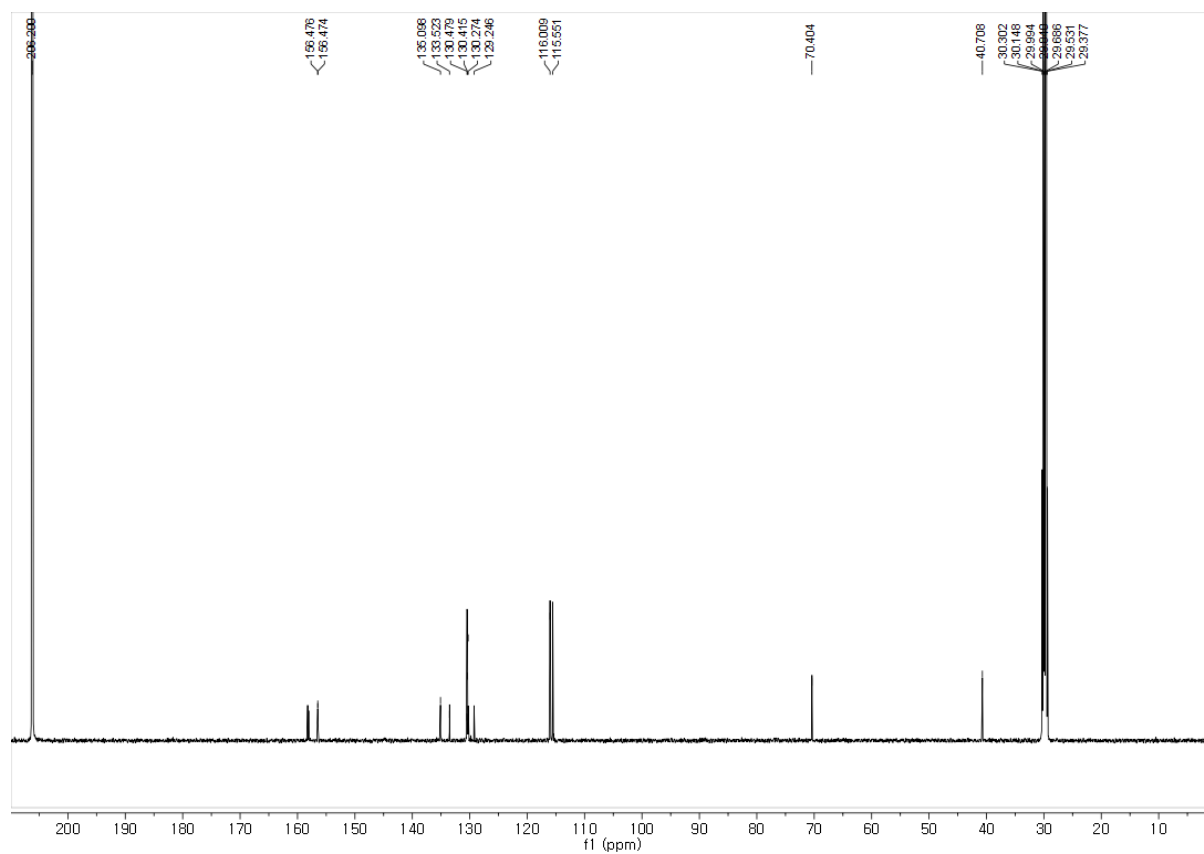

161

162 **Figure S2.** The  $^{13}\text{C}$  NMR spectrum of compound 1 (125 MHz,  $\text{CD}_3\text{COCD}_3$ ).

163

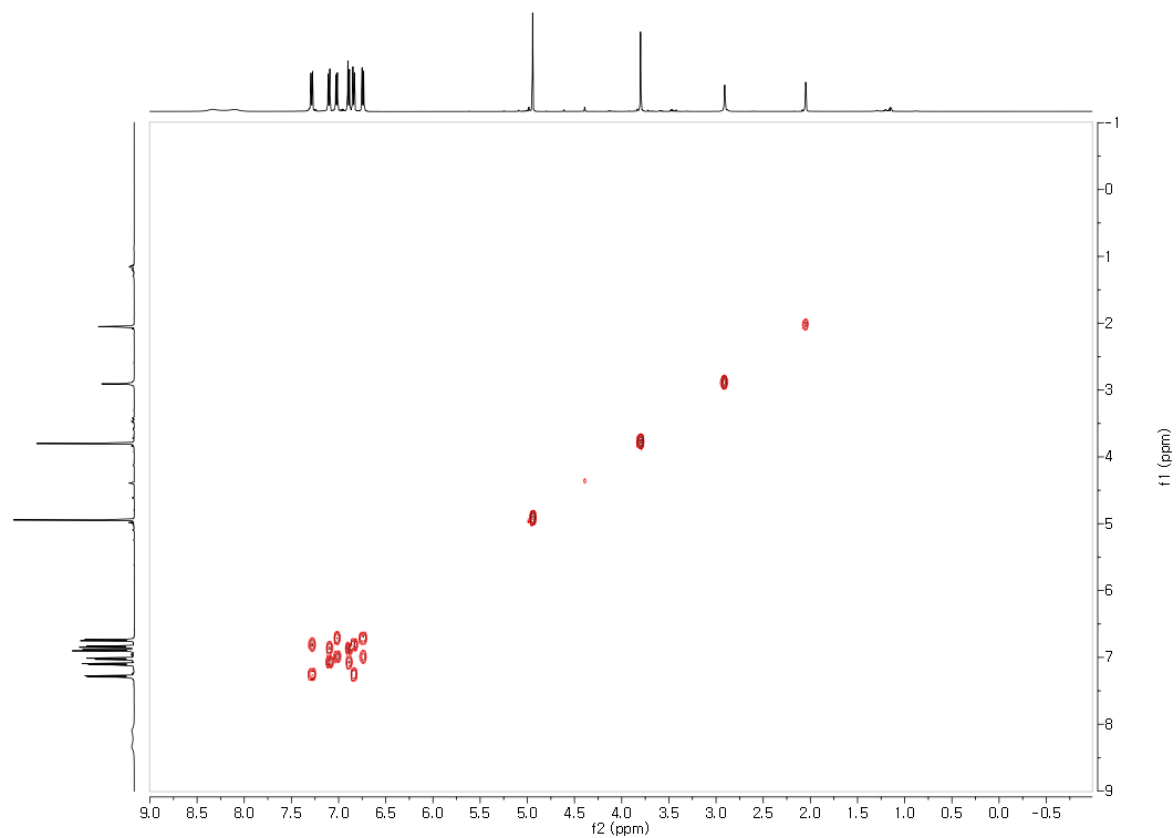

164

165

166

**Figure S3.** The  $^1\text{H}$ - $^1\text{H}$  COSY NMR spectrum of compound **1** (500 MHz,  $\text{CD}_3\text{COCD}_3$ ).

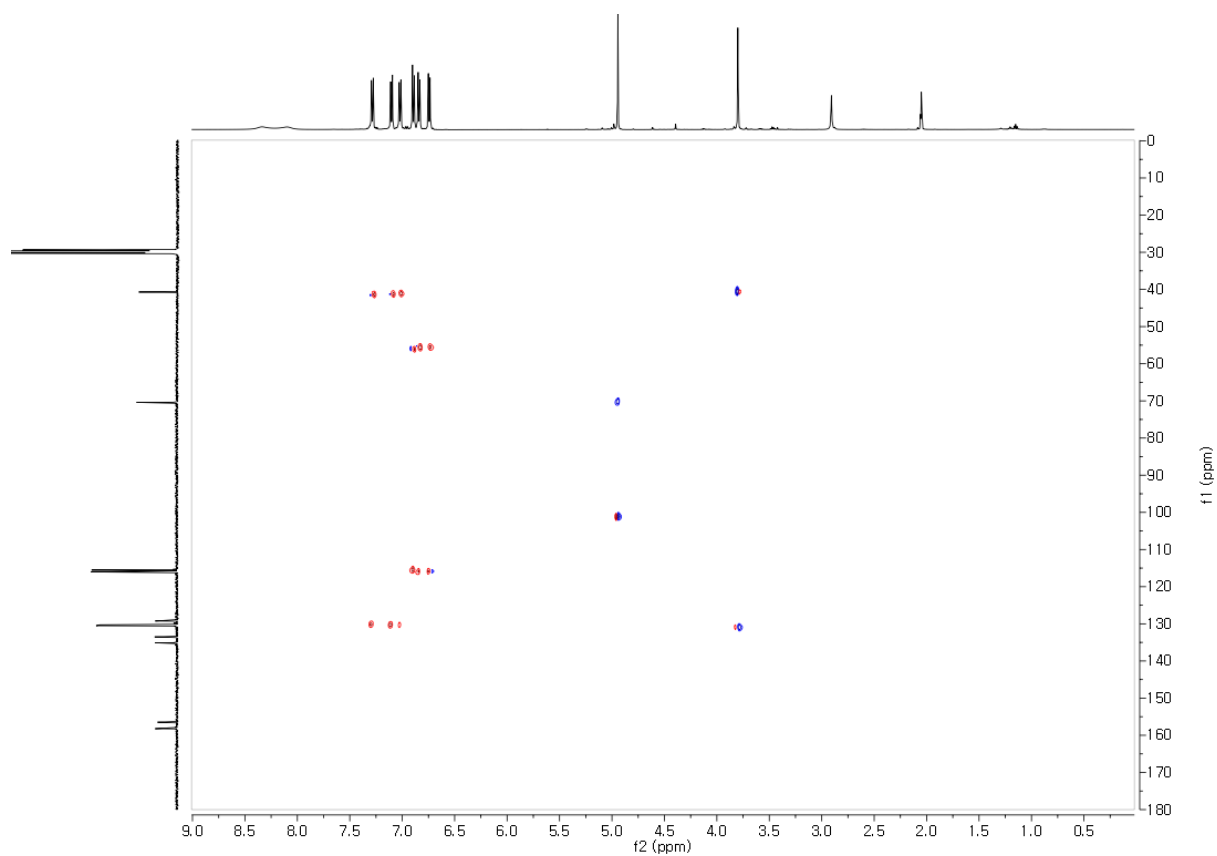

167

168

169

**Figure S4.** The HSQC NMR spectrum of compound **1** (500 MHz, CD<sub>3</sub>COCD<sub>3</sub>).

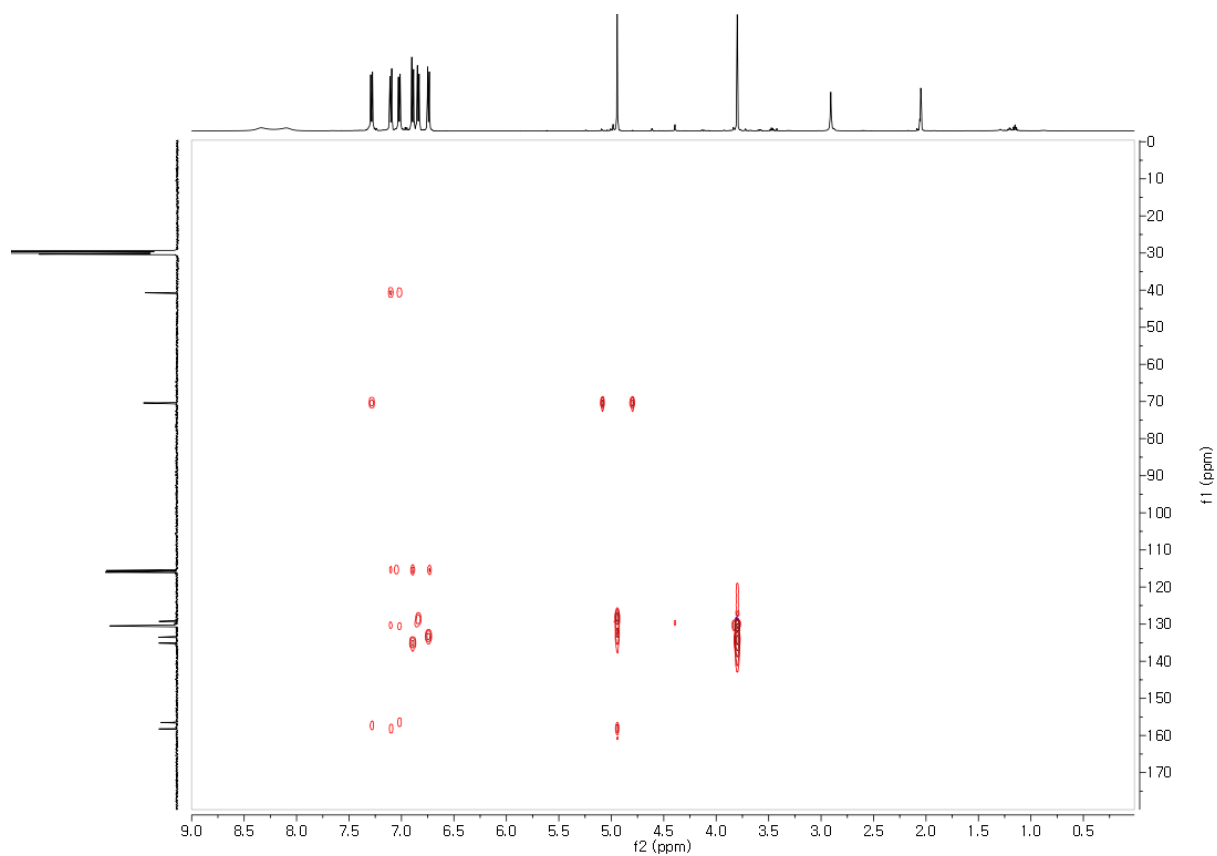

170

171

172

**Figure S5.** The HMBC NMR spectrum of compound 1 (500 MHz, CD<sub>3</sub>COCD<sub>3</sub>).

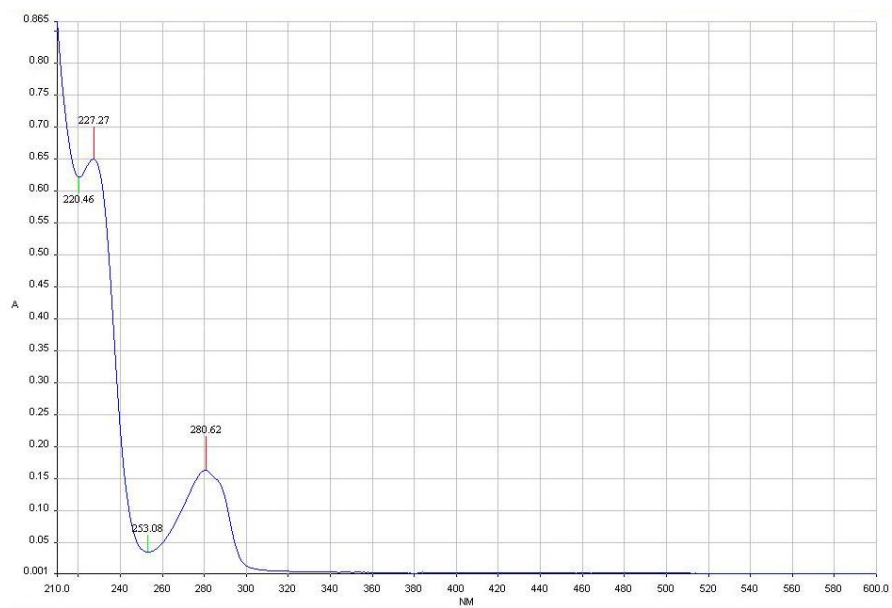

173

174

**Figure S6.** The UV spectrum of compound 1 ( $\text{CH}_3\text{OH}$ ,  $c=1.6 \times 10^{-5}$  M).

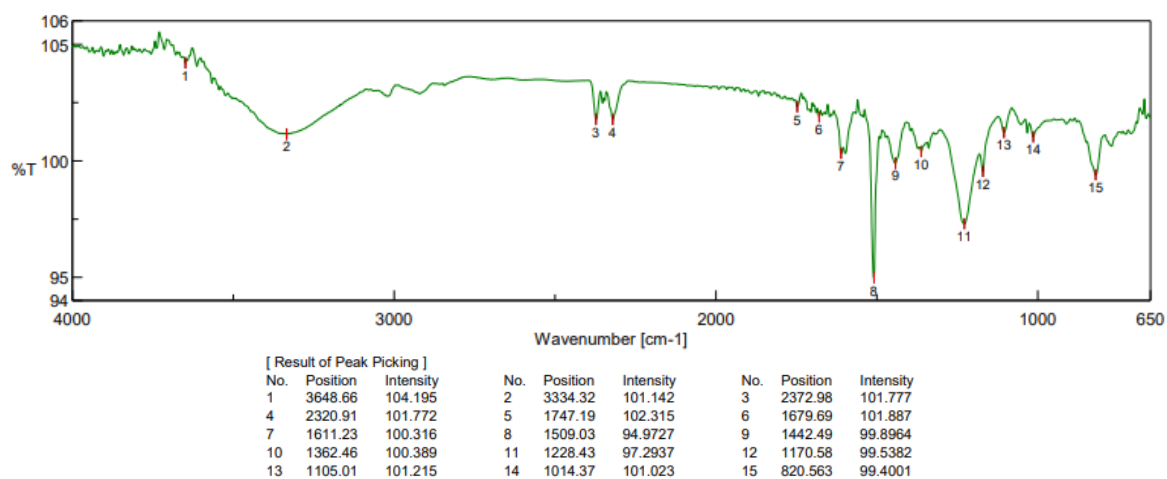

175

176 **Figure S7.** The IR spectrum of compound **1** [using the attenuated total reflection (ATR) sampling  
177 technique].

178

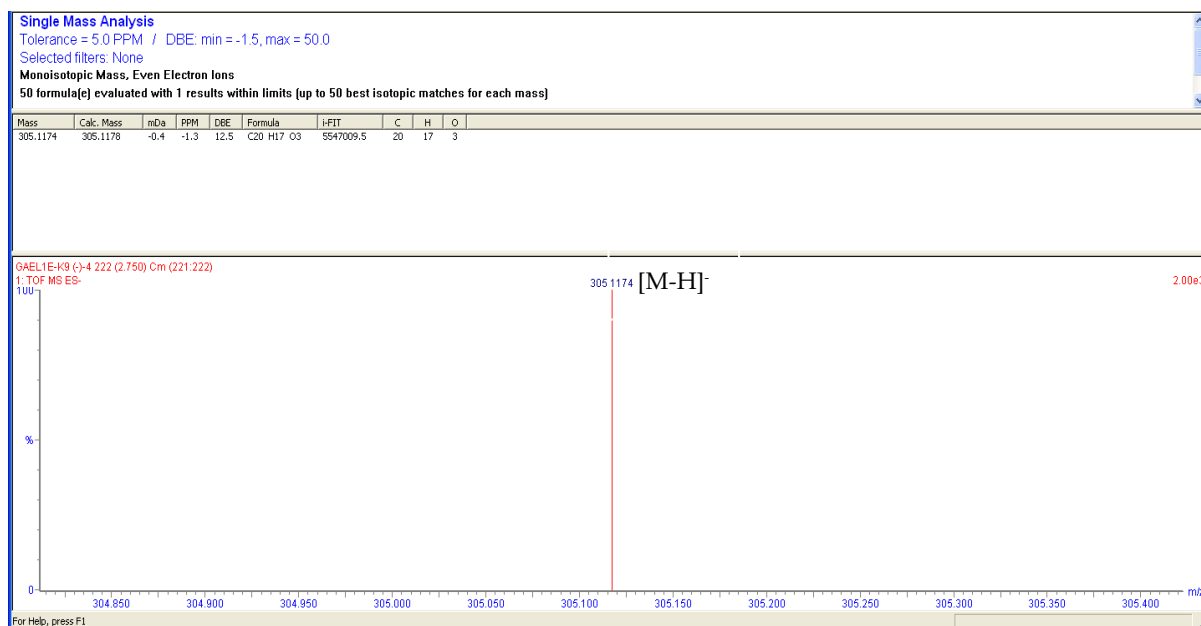

179

180 **Figure S8.** The HRESIMS spectrum of compound **1** ( $m/z$  305.1174 [M – H]<sup>–</sup>; calcd for C<sub>20</sub>H<sub>17</sub>O<sub>3</sub>,  
181 305.1178).

182

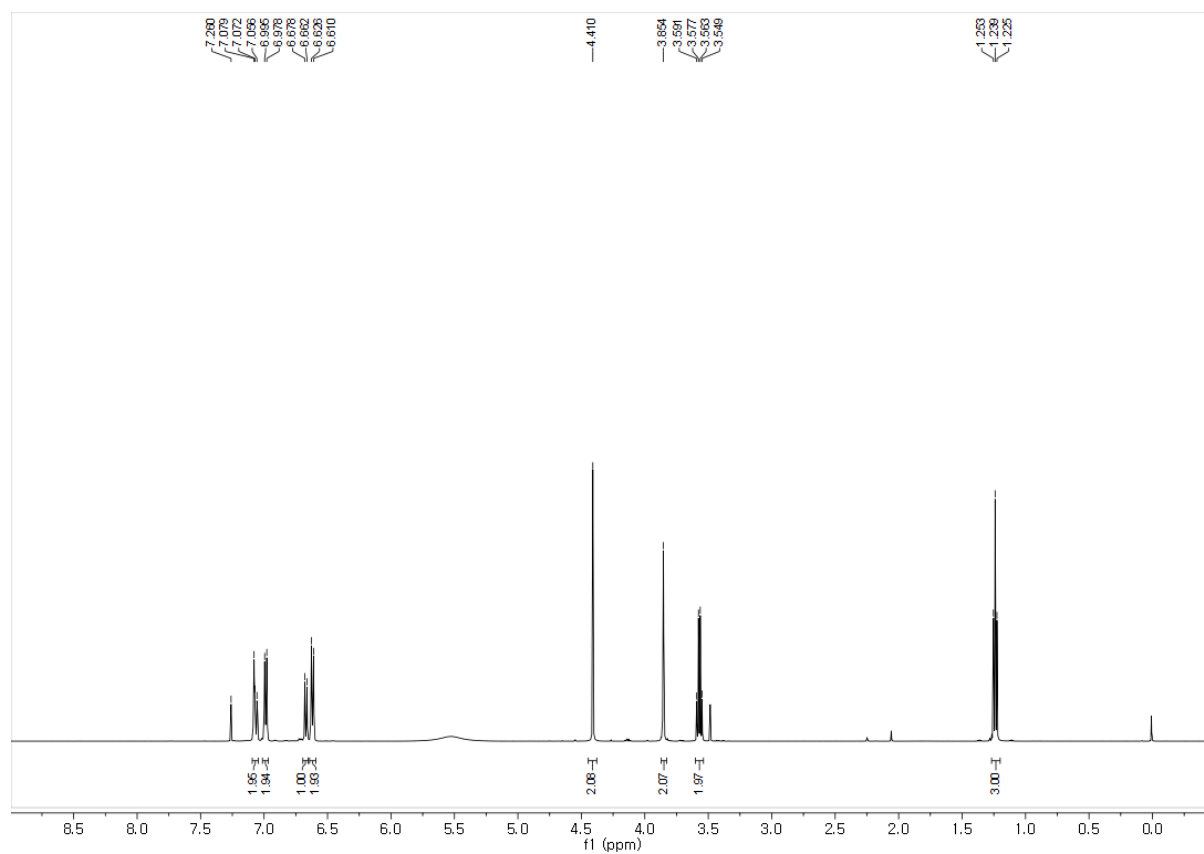

Figure S9. The  $^1\text{H}$  NMR spectrum of compound 2 (500 MHz,  $\text{CDCl}_3$ ).

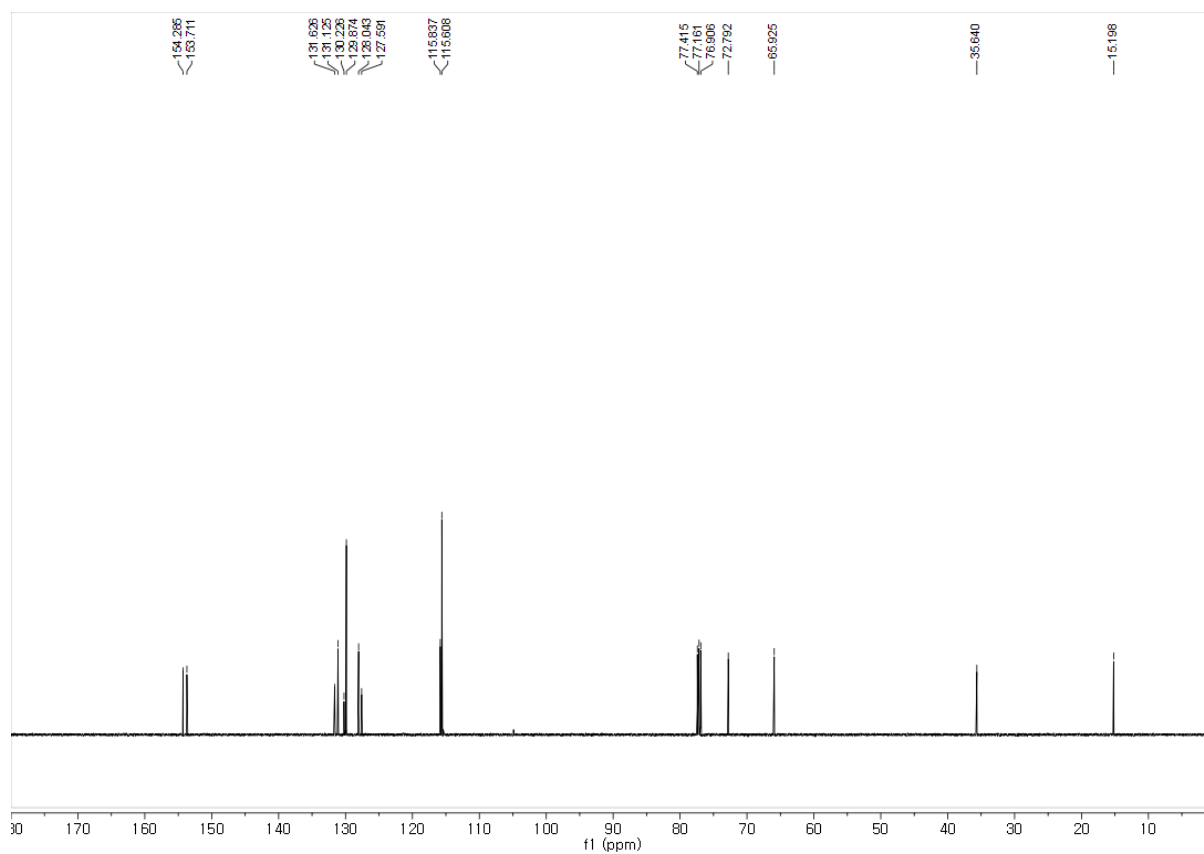

Figure 10. The  $^{13}\text{C}$  NMR spectrum of compound 2 (125 MHz,  $\text{CDCl}_3$ ).



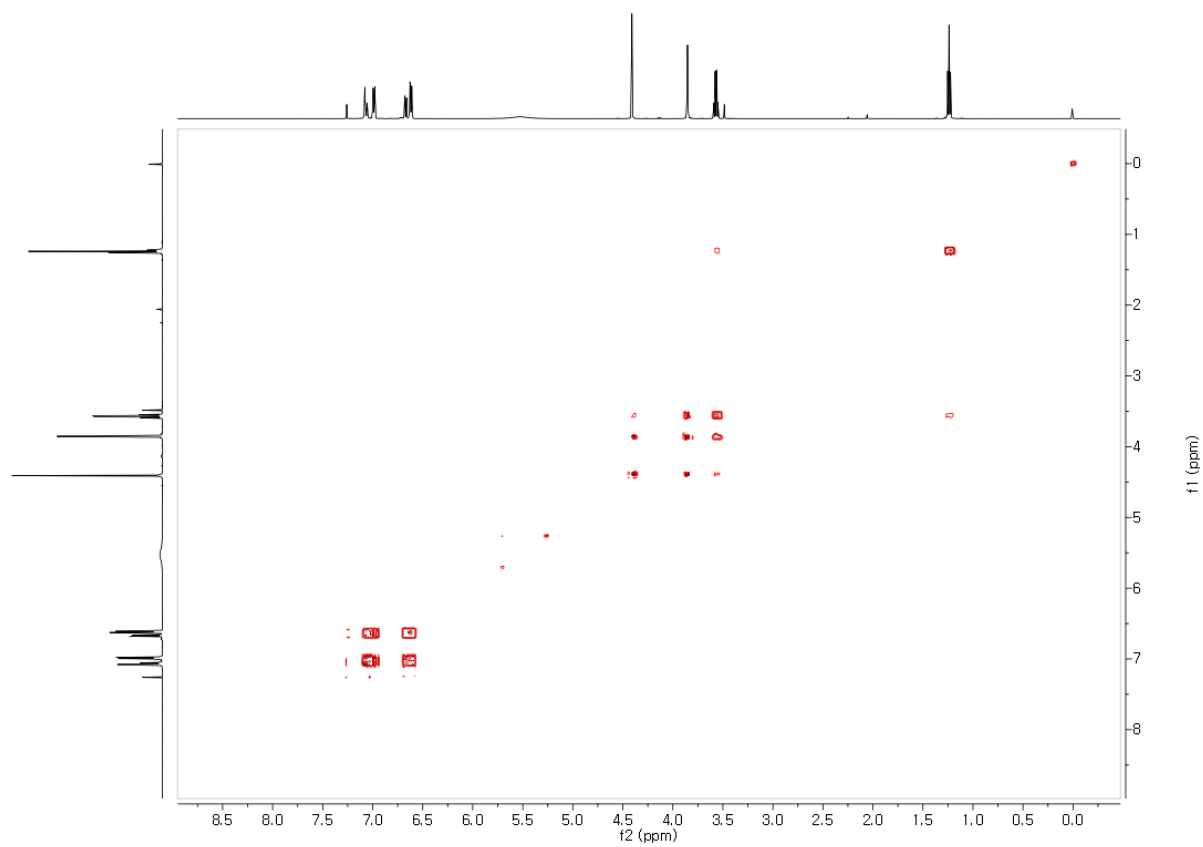

188

189

190

**Figure S11.** The  $^1\text{H}$ - $^1\text{H}$  COSY NMR spectrum of compound **2** (500 MHz,  $\text{CDCl}_3$ ).

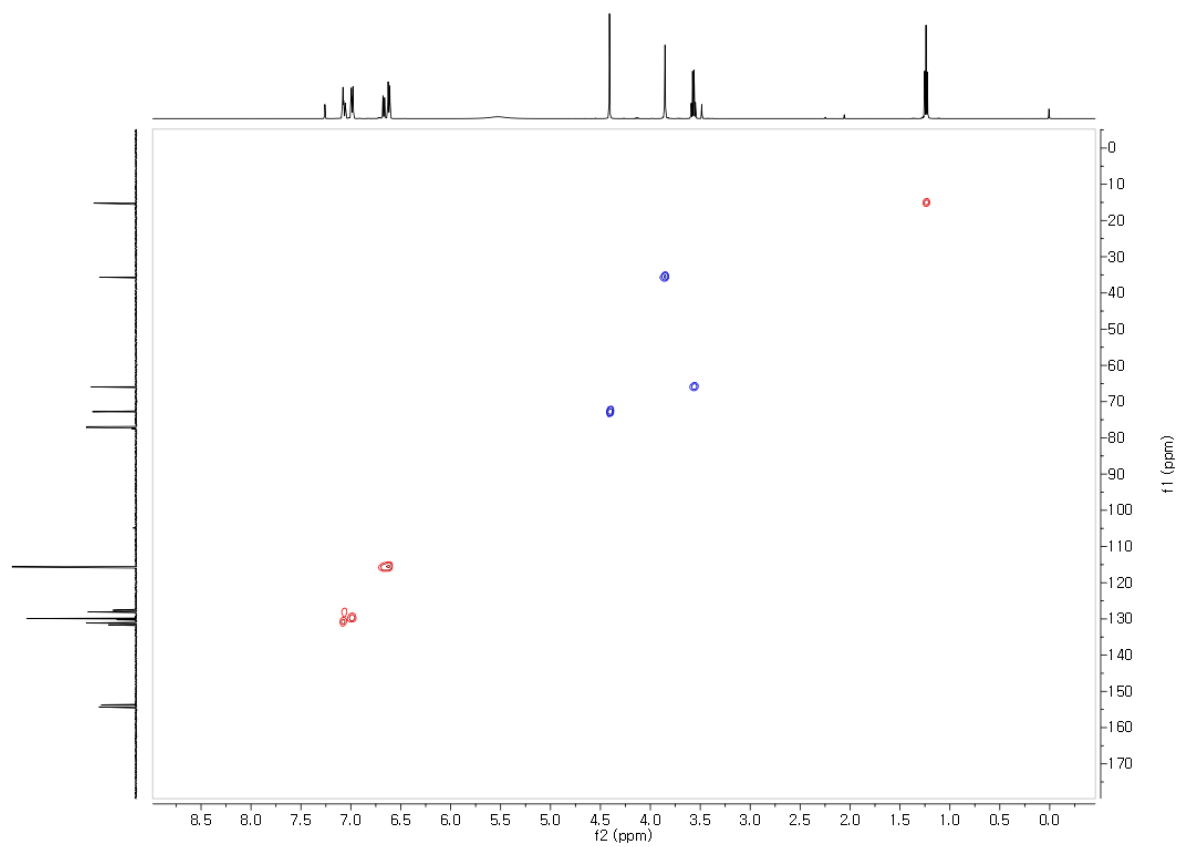

191

192 **Figure S12.** The HSQC NMR spectrum of compound **2** (500 MHz, CDCl<sub>3</sub>).

193

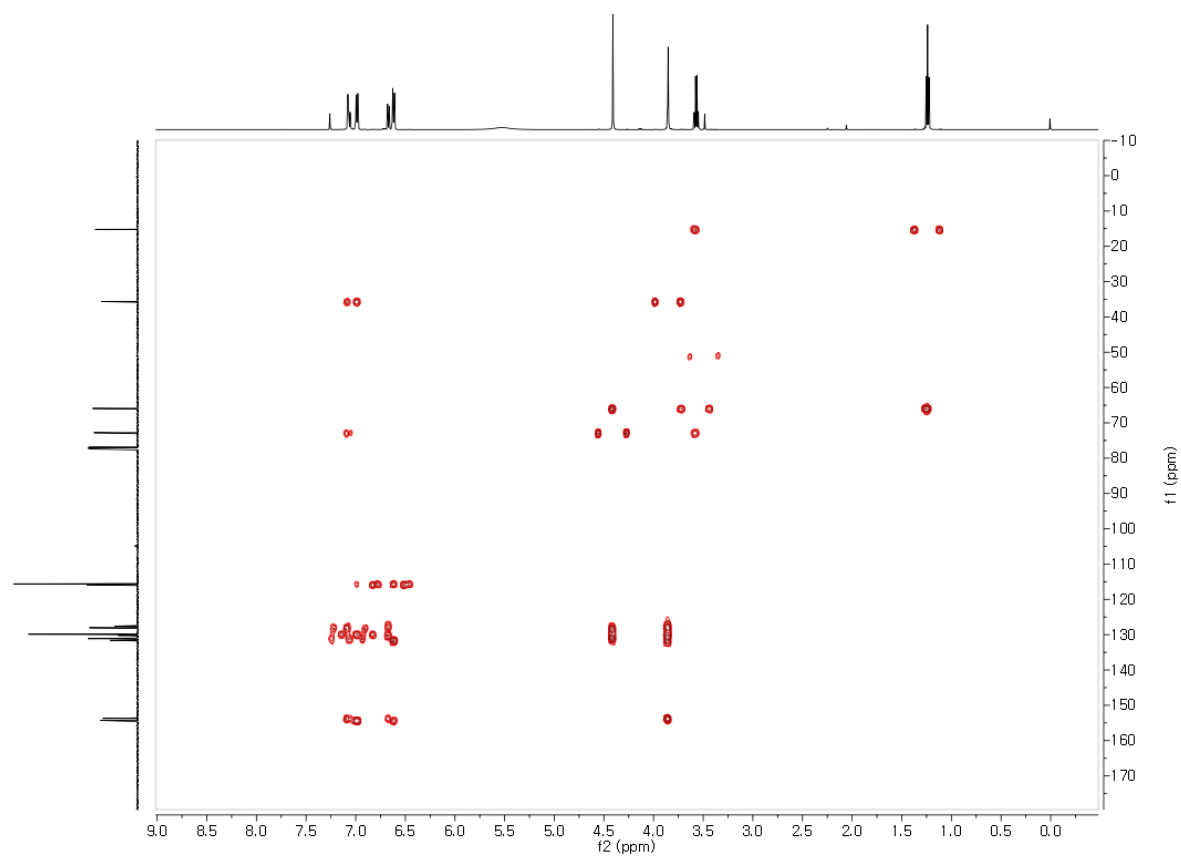

194

195 **Figure S13.** The HMBC NMR spectrum of compound 2 (500 MHz, CDCl<sub>3</sub>).

196

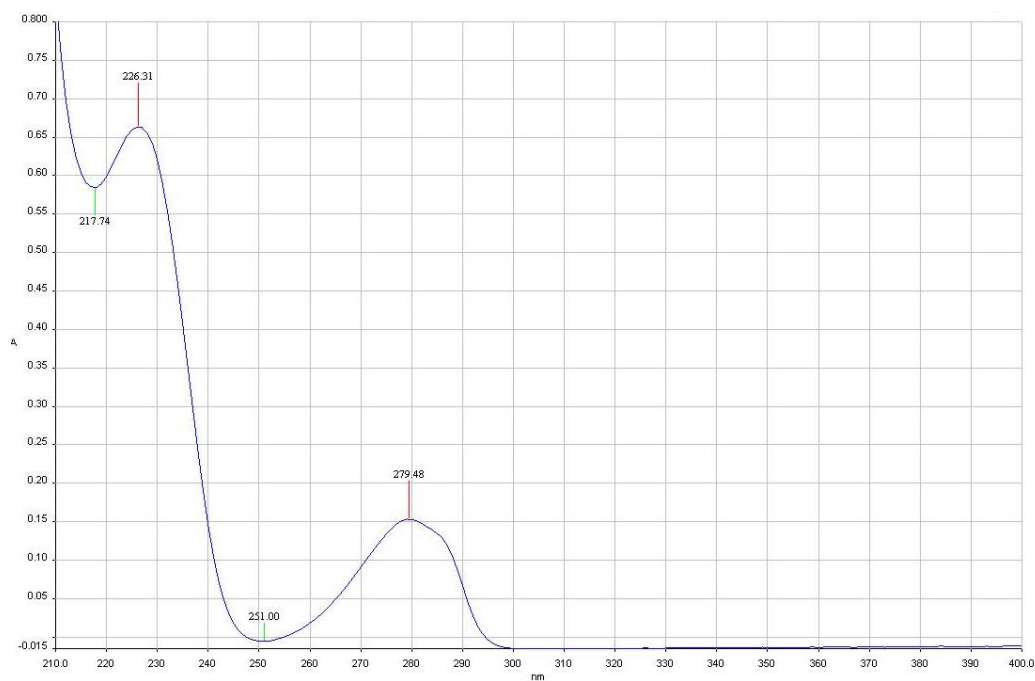

197

198 **Figure S14.** The UV spectrum of compound 2 ( $\text{CH}_3\text{OH}$ ,  $c=1.9 \times 10^{-5}$  M).

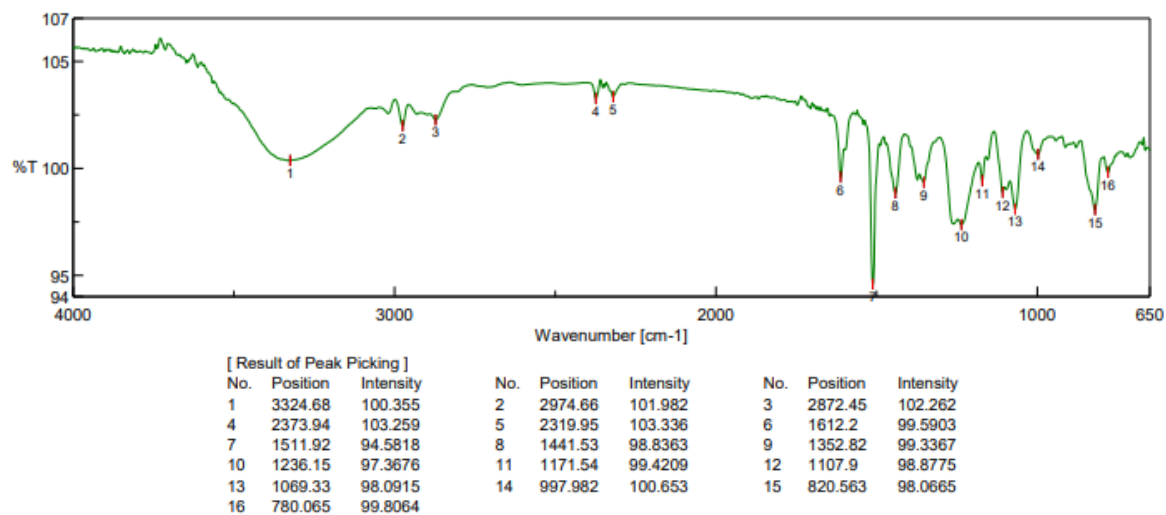

199

200 **Figure S15.** The IR spectrum of compound 2 [using the attenuated total reflection (ATR) sampling  
201 technique].

202

## Single Mass Analysis

Tolerance = 10.0 PPM / DBE: min = -1.5, max = 50.0

Element prediction: Off

Number of isotope peaks used for i-FIT = 3

Monoisotopic Mass, Even Electron Ions

1197 formula(e) evaluated with 6 results within limits (up to 50 closest results for each mass)

Elements Used:

| Mass     | Calc. Mass | mDa  | PPM  | DBE  | Formula        | i-FIT | i-FIT Norm | Fit Conf % | C  | H  | N  | O | S |
|----------|------------|------|------|------|----------------|-------|------------|------------|----|----|----|---|---|
| 257.1177 | 257.1178   | -0.1 | -0.4 | 8.5  | C16 H17 O3     | 341.7 | 0.000      | 100.00     | 16 | 17 |    | 3 |   |
|          | 257.1180   | -0.3 | -1.2 | -1.5 | C9 H25 N2 S3   | 362.9 | 21.195     | 0.00       | 9  | 25 | 2  |   | 3 |
|          | 257.1171   | 0.6  | 2.3  | -0.5 | C8 H21 N2 O5 S | 359.3 | 17.631     | 0.00       | 8  | 21 | 2  | 5 | 1 |
|          | 257.1183   | -0.6 | -2.3 | 1.5  | C H13 N12 O4   | 357.6 | 15.882     | 0.00       | 1  | 13 | 12 | 4 |   |
|          | 257.1185   | -0.8 | -3.1 | 4.5  | C9 H17 N6 O S  | 358.7 | 17.015     | 0.00       | 9  | 17 | 6  | 1 | 1 |
|          | 257.1196   | -1.9 | -7.4 | 6.5  | C2 H9 N16      | 359.2 | 17.557     | 0.00       | 2  | 9  | 16 |   |   |

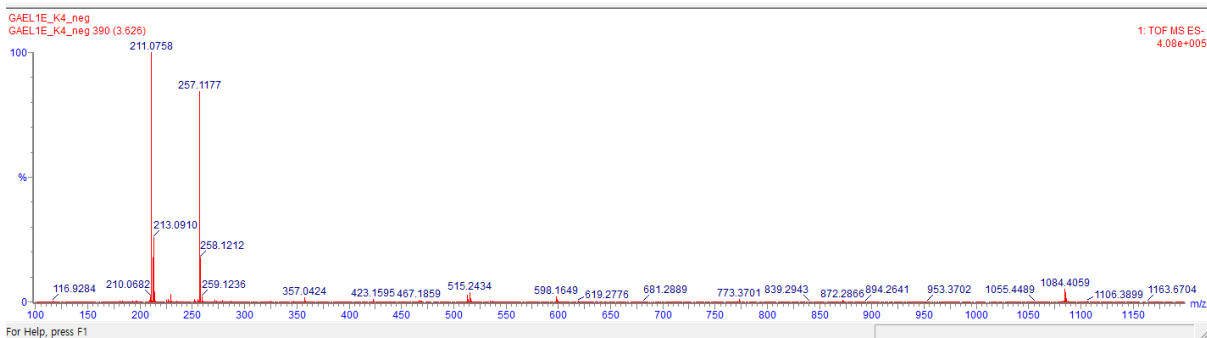

203  
204  
205  
206

**Figure S16.** The HRESIMS spectrum of compound 2 ( $m/z$  257.1177 [M – H]<sup>−</sup>); calcd for C<sub>16</sub>H<sub>17</sub>O<sub>3</sub>, 257.1178).

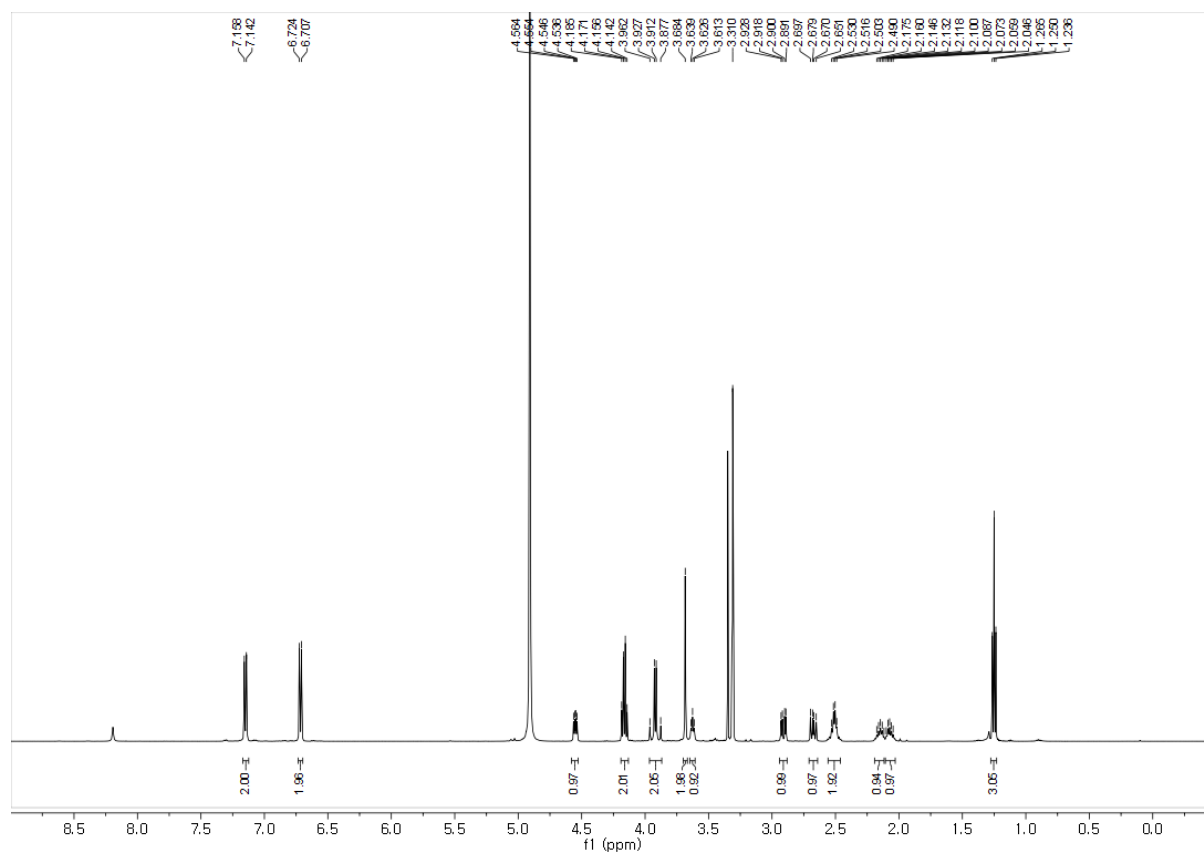

207

208 **Figure S17.** The  $^1\text{H}$  NMR spectrum of compound 3 (500 MHz,  $\text{CD}_3\text{OD}$ ).

209

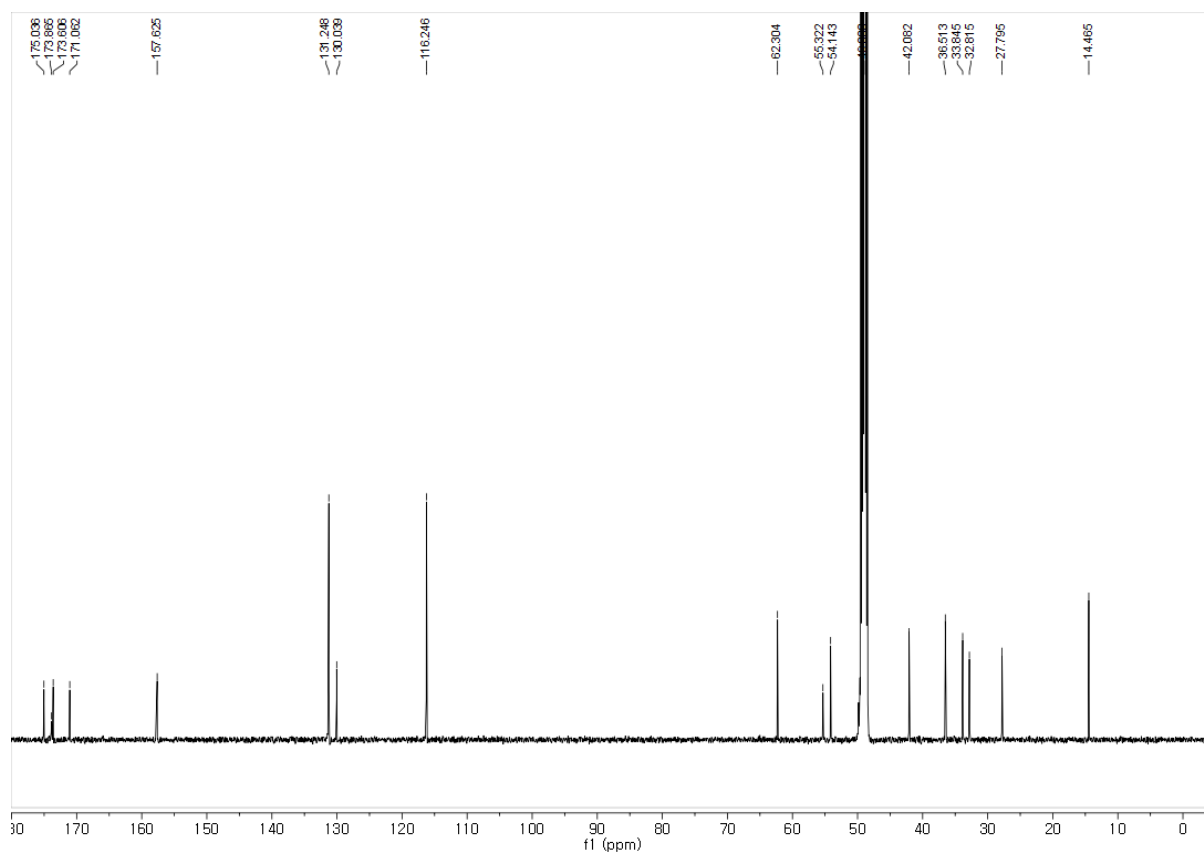

210

211 **Figure S18.** The  $^{13}\text{C}$  NMR spectrum of compound 3 (125 MHz,  $\text{CD}_3\text{OD}$ ).

212



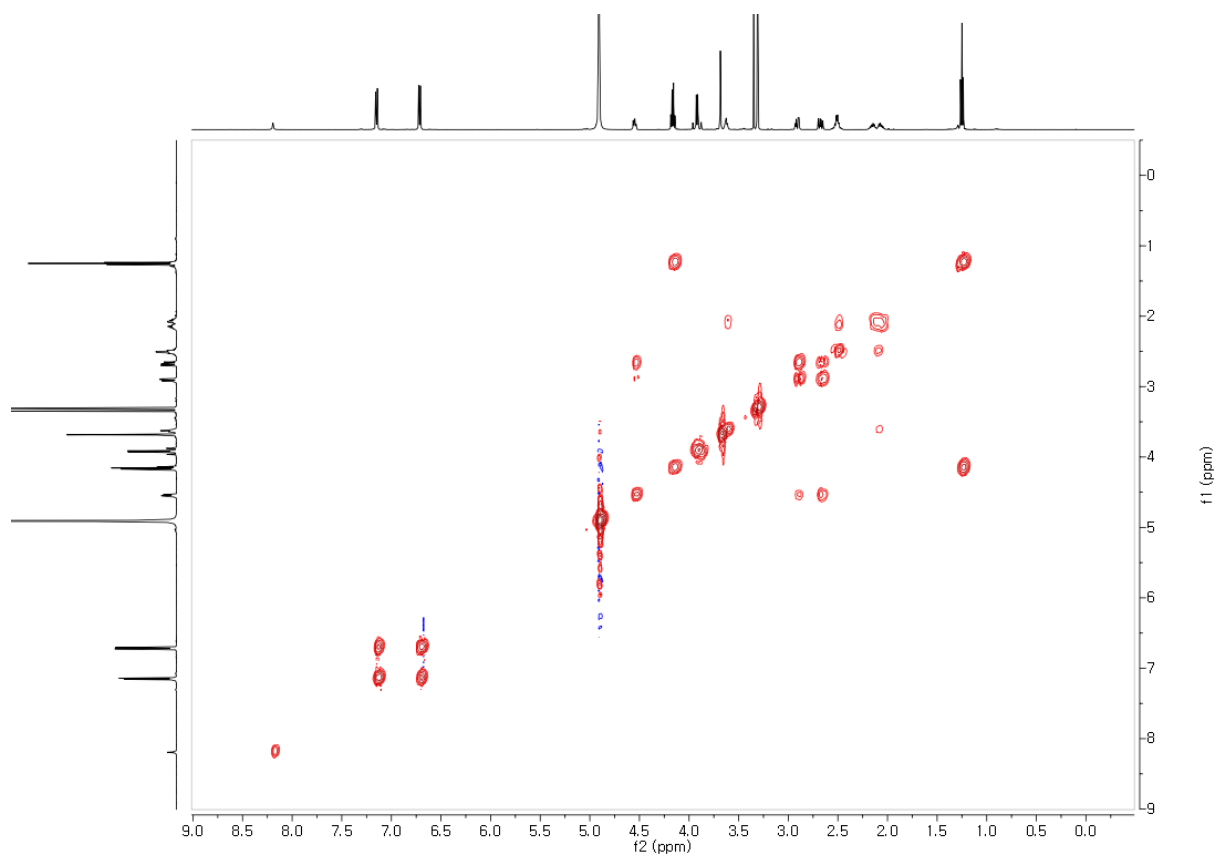

213

214 **Figure S19.** The  $^1\text{H}$ - $^1\text{H}$  COSY NMR spectrum of compound **3** (500 MHz,  $\text{CD}_3\text{OD}$ ).

215

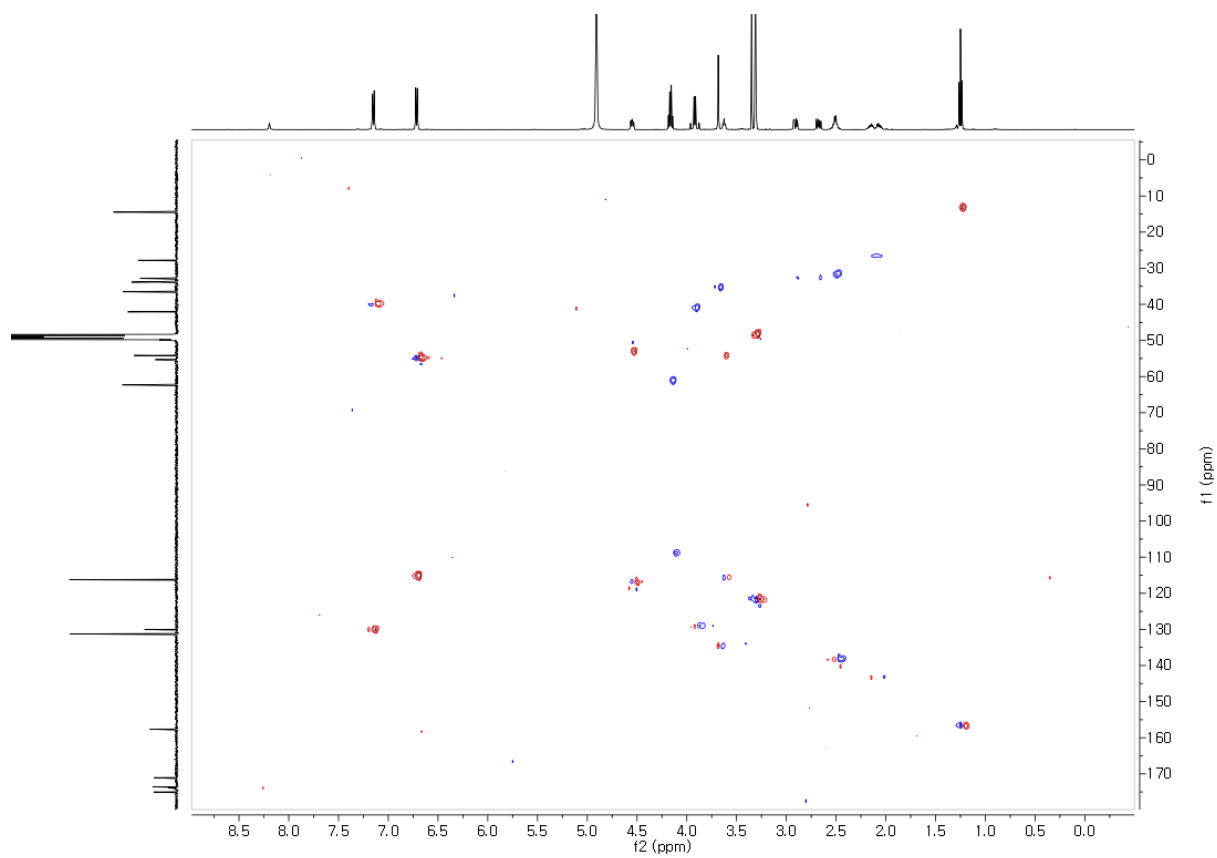

216

217 **Figure S20.** The HSQC NMR spectrum of compound **3** (500 MHz, CD<sub>3</sub>OD).

218

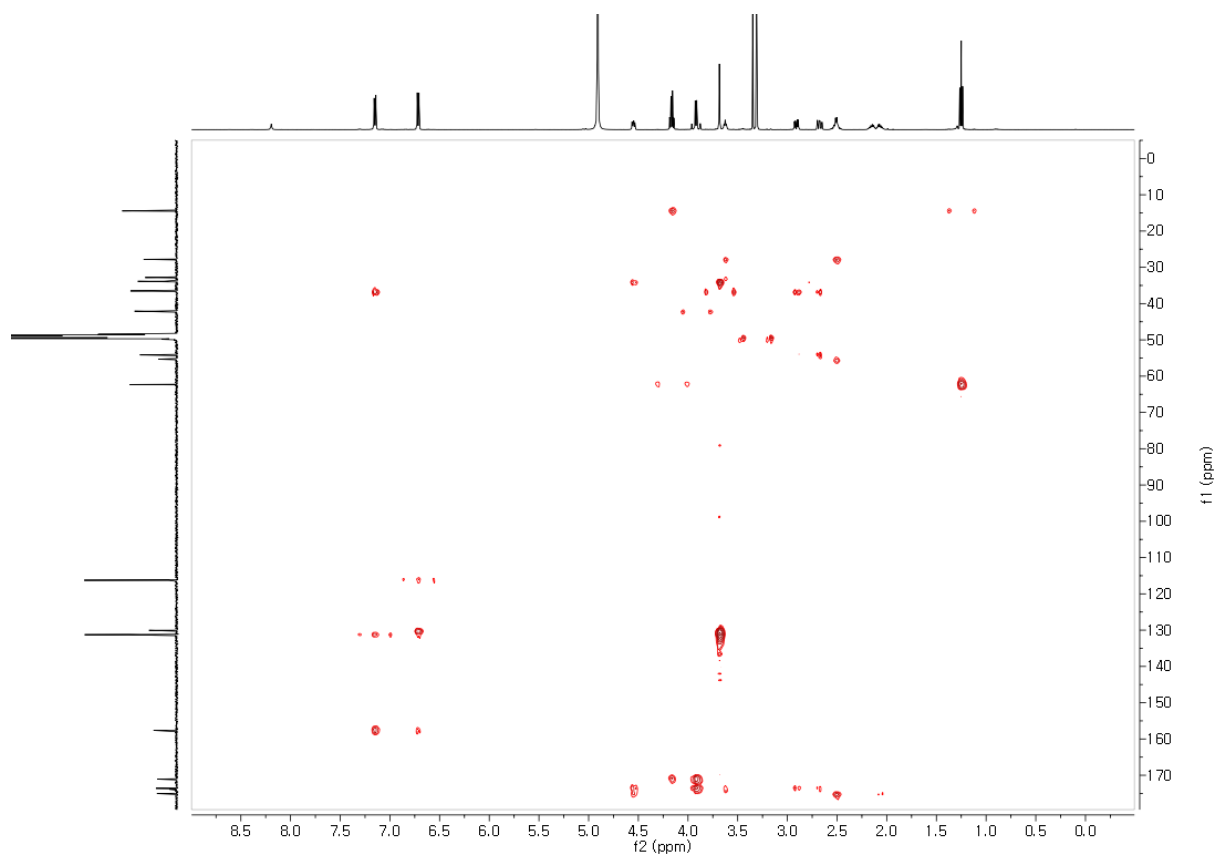

219

220 **Figure S21.** The HMBC NMR spectrum of compound 3 (500 MHz,  $\text{CD}_3\text{OD}$ ).

221

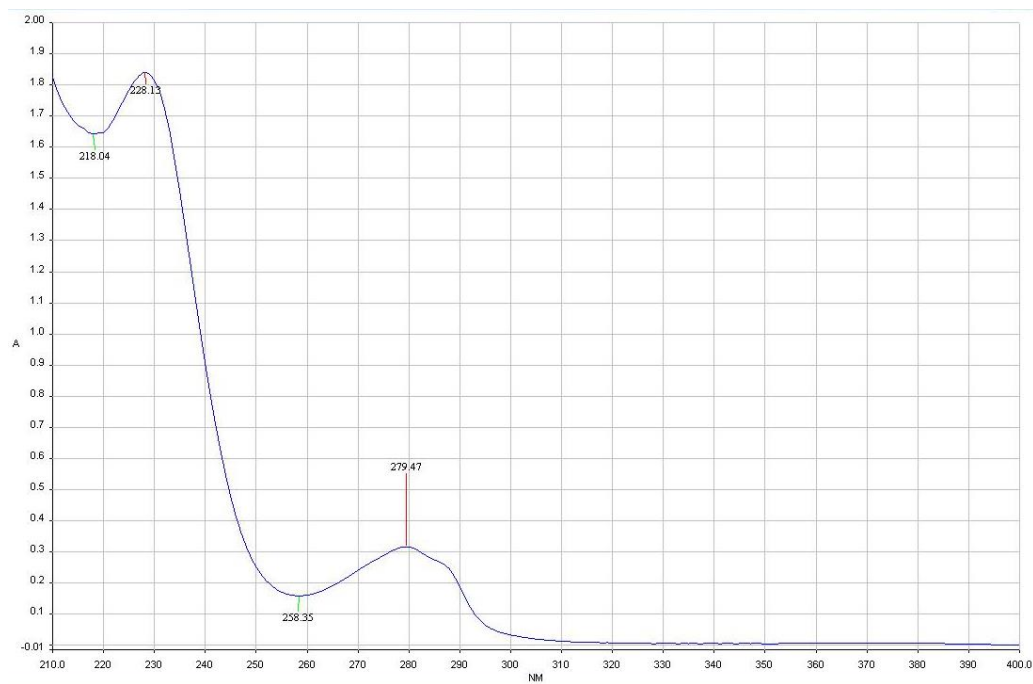

222

223 **Figure S22.** The UV spectrum of compound 3 ( $\text{CH}_3\text{OH}$ ,  $c=1.1 \times 10^{-5}$  M).

224

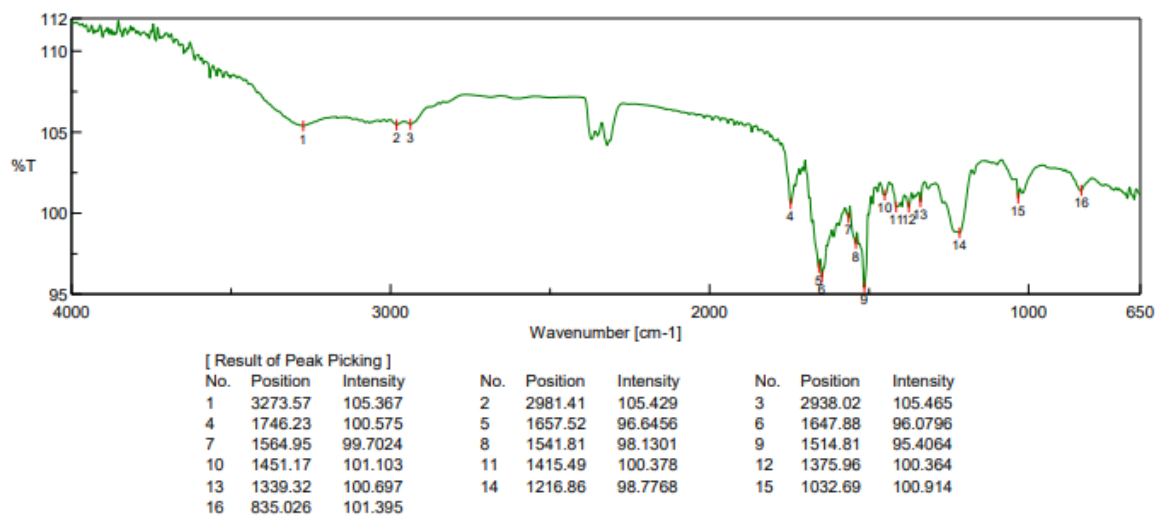

225

226 **Figure S23.** The IR spectrum of compound 3 [using the attenuated total reflection (ATR) sampling  
227 technique].

228

## Single Mass Analysis

Tolerance = 10.0 PPM / DBE: min = -1.5, max = 50.0

Element prediction: Off

Number of isotope peaks used for i-FIT = 3

Monoisotopic Mass, Even Electron Ions

6507 formula(e) evaluated with 39 results within limits (up to 50 closest results for each mass)

Elements Used:

| Mass     | Calc. Mass | mDa  | PPM  | DBE  | Formula          | i-FIT | i-FIT Norm | Fit Conf % | C  | H  | N  | O  | S |
|----------|------------|------|------|------|------------------|-------|------------|------------|----|----|----|----|---|
| 440.1487 | 440.1485   | 0.2  | 0.5  | -0.5 | C11 H30 N5 O9 S2 | 272.7 | 10.270     | 0.00       | 11 | 30 | 5  | 9  | 2 |
| 440.1490 | -0.3       | -0.7 | 5.5  |      | C11 H22 N9 O10   | 277.6 | 15.403     | 0.00       | 11 | 22 | 9  | 10 |   |
| 440.1491 | -0.4       | -0.9 | 8.5  |      | C19 H26 N3 O7 S  | 263.9 | 1.544      | 21.36      | 19 | 26 | 3  | 7  | 1 |
| 440.1494 | -0.7       | -1.6 | -1.5 |      | C12 H34 N5 O4 S4 | 276.7 | 14.270     | 0.00       | 12 | 34 | 5  | 4  | 4 |
| 440.1478 | 0.9        | 2.0  | 14.5 |      | C16 H18 N13 O S  | 267.3 | 4.876      | 0.76       | 16 | 18 | 13 | 1  | 1 |
| 440.1496 | -0.9       | -2.0 | 1.5  |      | C4 H22 N15 O8 S  | 275.6 | 13.214     | 0.00       | 4  | 22 | 15 | 8  | 1 |
| 440.1476 | 1.1        | 2.5  | 11.5 |      | C8 H14 N19 O4    | 277.7 | 15.302     | 0.00       | 8  | 14 | 19 | 4  |   |
| 440.1498 | -1.1       | -2.5 | 17.5 |      | C27 H22 N O5     | 276.3 | 13.902     | 0.00       | 27 | 22 | 1  | 5  |   |

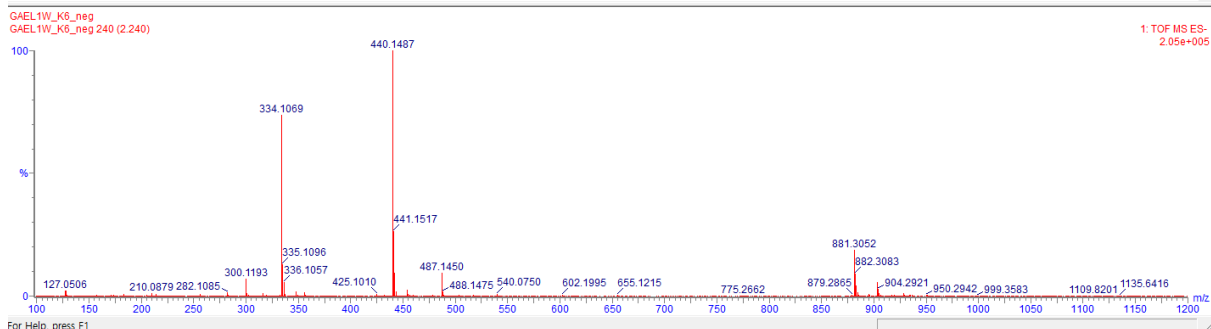

229

230

231

232

233

**Figure S24.** The HRESIMS spectrum of compound **3** ( $m/z$  440.1487 [ $M - H$ ] $^-$ ; calcd for  $C_{19}H_{26}N_3O_7S$ , 440.1491).
